# Supplementary material
Source: MDPI journal article supplement (https://www.mdpi.com/1424-8247/14/11/1096)
Supplement: s1 [file s1]

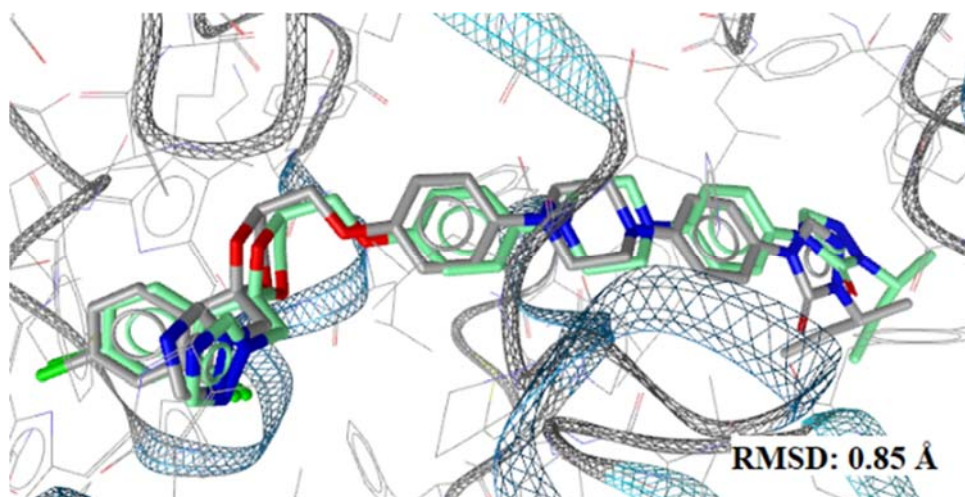

**Figure S1.** Docking of the initial inhibitor 2-[(2R)-butan-2-yl]-4-{4-[4-((2R,4S)-2-(2,4-dichlorophenyl)-2-(1H-1,2,4-triazol-1-ylmethyl)-1,3-dioxolan-4-yl)methoxy}phenyl]piperazin-1-yl}phenyl]-2,4-dihydro-3H-1,2,4-triazol-3-one to the 5V5Z structure.
