# Supplementary material
Source: MDPI journal article supplement (https://www.mdpi.com/1424-8247/14/11/1096)
Supplement: s1 [file s1]

## 4-(Indol-3-yl) thiazole-2-amines and 4-indol-3-yl)thiazole acylamines as Novel antimicrobial agents. Synthesis, in silico and in vitro evaluation.

Simakov S.<sup>a</sup>, Kartsev V.<sup>b</sup>, Petrou A.<sup>c</sup>, Nicolaou I.<sup>c</sup> Geronikaki A.<sup>c,\*</sup>, Ivanov M.<sup>d</sup>, Kostić M.<sup>d</sup>, Glamočlija J.<sup>d</sup>, Soković M.<sup>d</sup>, Talea T.D.<sup>e</sup> and Vizirianakis I.<sup>e, f</sup>

<sup>a</sup> Belgorod State University, Russia.

<sup>b</sup> InterBioScreen, Chernogolovka, Moscow Region, Russia.

<sup>c</sup> School of Pharmacy Dep/t Pharm. Chemistry, Aristotle University of Thessaloniki, 54124, Thessaloniki, Greece.

<sup>d</sup> Mycological Laboratory, Department of Plant Physiology, Institute for Biological Research “Siniša Stanković”, National Institute of Republic of Serbia, University of Belgrade, Beograd 11060, Serbia.

<sup>e</sup> Laboratory of Pharmacology, School of Pharmacy, Aristotle University of Thessaloniki, GR-54124 Thessaloniki, Greece.

<sup>f</sup> Department of Life and Health Sciences, University of Nicosia, CY-1700 Nicosia, Cyprus.

**Table S1.** Antibacterial activity of methylindole derivatives. (MIC and MBC in mg/ml)

| Compounds    |     | <i>S.a.</i> | <i>B.c.</i> | <i>L.m.</i> | <i>E.c.</i> | <i>S.t.</i> | <i>En.cl.</i> |
|--------------|-----|-------------|-------------|-------------|-------------|-------------|---------------|
| 5g           | MIC | >3.75       | 0.47        | 0.94        | 0.47        | 0.94        | 0.94          |
|              | MBC | >3.75       | 0.94        | 1.88        | 0.94        | 1.88        | 1.88          |
| 5h           | MIC | >3.75       | 0.94        | 0.94        | 1.88        | 0.94        | 0.94          |
|              | MBC | >3.75       | 1.88        | 1.88        | 3.75        | 1.88        | 1.88          |
| 5i           | MIC | >3.75       | 0.94        | 0.94        | 0.94        | 0.47        | 0.94          |
|              | MBC | >3.75       | 1.88        | 1.88        | 1.88        | 0.94        | 1.88          |
| 5j           | MIC | >3.75       | 0.94        | 0.94        | 1.88        | 0.94        | 1.88          |
|              | MBC | >3.75       | 1.88        | 1.88        | 3.75        | 1.88        | 3.75          |
| 5k           | MIC | >3.75       | 1.88        | 1.88        | 1.88        | 1.88        | >3.75         |
|              | MBC | >3.75       | 3.75        | 3.75        | 3.75        | 3.75        | >3.75         |
| 5p           | MIC | >3.75       | 0.94        | 0.47        | 3.75        | 3.75        | 3.75          |
|              | MBC | >3.75       | 1.88        | 0.94        | >3.75       | >3.75       | >3.75         |
| 5t           | MIC | >3.75       | >3.75       | 0.47        | >3.75       | >3.75       | >3.75         |
|              | MBC | >3.75       | >3.75       | 0.94        | >3.75       | >3.75       | >3.75         |
| 5w           | MIC | >3.75       | 0.94        | 1.88        | 1.88        | >3.75       | >3.75         |
|              | MBC | >3.75       | 1.88        | 3.75        | 3.75        | >3.75       | >3.75         |
| 6a           | MIC | >3.75       | >3.75       | 0.94        | >3.75       | >3.75       | >3.75         |
|              | MBC | >3.75       | >3.75       | 1.88        | >3.75       | >3.75       | >3.75         |
| 6b           | MIC | >3.75       | >3.75       | 1.88        | >3.75       | >3.75       | >3.75         |
|              | MBC | >3.75       | >3.75       | 3.75        | >3.75       | >3.75       | >3.75         |
| 6c           | MIC | >3.75       | >3.75       | >3.75       | >3.75       | >3.75       | >3.75         |
|              | MBC | >3.75       | >3.75       | >3.75       | >3.75       | >3.75       | >3.75         |
| 6d           | MIC | >3.75       | 1.88        | 0.94        | >3.75       | >3.75       | >3.75         |
|              | MBC | >3.75       | 3.75        | 1.88        | >3.75       | >3.75       | >3.75         |
| 6e           | MIC | >3.75       | >3.75       | 1.88        | >3.75       | >3.75       | >3.75         |
|              | MBC | >3.75       | >3.75       | 3.75        | >3.75       | >3.75       | >3.75         |
| 6f           | MIC | >3.75       | >3.75       | 1.88        | >3.75       | >3.75       | >3.75         |
|              | MBC | >3.75       | >3.75       | 3.75        | >3.75       | >3.75       | >3.75         |
| Streptomycin | MIC | 0.10±0.00   | 0.02±0.00   | 0.15±0.00   | 0.10±0.00   | 0.10±0.00   | 0.02±0.00     |
|              | MBC | 0.20±0.01   | 0.05±0.00   | 0.30±0.01   | 0.20±0.00   | 0.20±0.01   | 0.05±0.00     |
| Ampicillin   | MIC | 0.10±0.00   | 0.10±0.00   | 0.15±0.00   | 0.15±0.00   | 0.10±0.00   | 0.10±0.00     |
|              | MBC | 0.15±0.00   | 0.15±0.00   | 0.30±0.02   | 0.20±0.01   | 0.20±0.00   | 0.15±0.01     |

**Table S2** Molecular docking free binding energies (kcal/mol) to antifungal targets of indole-based thiazole derivatives.

| No | Est. binding energy(kcal/mol) |                     | I-H | Residues involved in Hydrogen Bonds | Aromatic-positive ionizable | Hydrophobic interactions | Interactions with HEM601 |
|----|-------------------------------|---------------------|-----|-------------------------------------|-----------------------------|--------------------------|--------------------------|
|    | Dihydrofolate reductase       | CYP51 <sub>Ca</sub> |     |                                     |                             |                          |                          |

|              | (PDB: 4HOF) | (PDB: 5V5Z) | interactions |                |                |                                                                                                        | of CYP51 <sub>Ca</sub>                |
|--------------|-------------|-------------|--------------|----------------|----------------|--------------------------------------------------------------------------------------------------------|---------------------------------------|
| 5a           | -1.25       | -8.35       | 1            | Tyr64          | -              | Hem601, Ile131, Leu376, Met508                                                                         | Hydrophobic                           |
| 5c           | -2.15       | -7.96       | 1            | Tyr118         | -              | Hem601, Tyr64, Tyr118, Ile131, Leu376, Met508                                                          | Hydrophobic                           |
| 5d           | -3.69       | -11.62      | 1            | Tyr132         | Hem601         | Hem601, Ile131, Tyr132, Phe288, Thr311, Leu376, Met508, Val509                                         | Aromatic<br>Fe binding<br>Hydrophobic |
| 5e           | -3.45       | -8.83       | 2            | Tyr64, Tyr118  | -              | Hem601, Ile131, Leu300, Leu376, Met508                                                                 | Hydrophobic                           |
| 5f           | -2.67       | -8.05       | 1            | Tyr132         | -              | Hem601, Tyr64, Ile131, Tyr132, His377, Met508                                                          | Hydrophobic                           |
| 5i           | -1.14       | -8.13       | 1            | Tyr118         | -              | Hem601, Tyr118, Ile131, Leu376, Met508                                                                 | Hydrophobic                           |
| 5l           | -4.17       | -11.13      | 2            | Tyr132, Met508 | Tyr188, Hem601 | Hem601, Tyr118, Tyr122, Ile131, Tyr132, Phe233, Tyr305, Leu376, Met508, Val509                         | Aromatic<br>Hydrophobic               |
| 5m           | -3.67       | -10.41      | 2            | Tyr64, Tyr132  | -              | Hem601, Tyr118, Tyr132, Leu376, Met508, Val509                                                         | Hydrophobic                           |
| 5n           | -1.11       | -9.46       | 2            | Tyr118, Met508 | Tyr132         | Hem601, Ile131, Ile304, Leu376, Met508, Val509                                                         | Hydrophobic                           |
| 5o           | -2.03       | -9.54       | 2            | Tyr64, Tyr118  | Tyr132         | Hem601, Tyr118, Ile131, Leu376, Met508, Val509                                                         | Hydrophobic                           |
| 5q           | -1.18       | -8.21       | 1            | Tyr118         | Tyr188         | Hem601, Ile131, Tyr132, Leu376                                                                         | Hydrophobic                           |
| 5s           | -3.97       | -7.38       | 1            | Tyr64          | -              | Hem601, Ile131, Tyr132, Met508                                                                         | Hydrophobic                           |
| 5u           | -1.29       | -8.21       | 1            | Met508         | Hem601         | Hem601, Ile131, Tyr132, Leu376, Met508, Val509                                                         | Aromatic<br>Hydrophobic               |
| 5v           | -3.12       | -9.75       | 1            | Tyr64          | Hem601         | Hem601, Tyr118, Ile131, Tyr132, Leu376, Met508, Val509                                                 | Aromatic<br>Hydrophobic               |
| 5x           | -3.74       | -12.55      | 1            | Hem601         | -              | Hem601, Tyr118, Thr122, Phe126, Ile131, Tyr132, Phe288, Phe233, Thr311, Leu376, Phe380, Met508, Val509 | Hydrogen bond<br>Hydrophobic          |
| Ketoconazole | -           | -8.23       | 1            | Tyr64          | Hem601         | Tyr118, Ile131, Tyr132, Hem601, Ile304, Leu300, Leu376, Met508                                         | Aromatic,<br>Hydrophobic              |

\*Number of hydrogen bonds.

**Table S3 .** Molecular docking free binding energies (kcal/mol) to antifungal targets of methylindole-based thiazole derivatives.

| No | Est. binding energy(kcal/mol) | I-H* | Residues involved in | Aromatic-positive | Hydrophobic interactions | Interactions with |
|----|-------------------------------|------|----------------------|-------------------|--------------------------|-------------------|
|----|-------------------------------|------|----------------------|-------------------|--------------------------|-------------------|

|              | Dihydrofolate<br>reductase<br>(PDB: 4HOF) | CYP51 <sub>Ca</sub><br>(PDB: 5V5Z) |   | Hydrogen Bonds | ionizable<br>interactions | HEM601<br>of CYP51 <sub>Ca</sub>                                     |                                                              |
|--------------|-------------------------------------------|------------------------------------|---|----------------|---------------------------|----------------------------------------------------------------------|--------------------------------------------------------------|
| 5b           | -3.26                                     | -10.84                             | 2 | Tyr64, Tyr132  | Tyr188                    | Hem601, Tyr118, Ile131,<br>Tyr132, Leu376, Met508                    | Hydrophobic                                                  |
| 5g           | -3.14                                     | -10.54                             | 1 | Hem601         | -                         | Hem601, Phe126, Ile131,<br>Tyr132, Phe233, Thr311,<br>Leu376, Met508 | Hydrogen<br>bond,<br>Hydrophobic                             |
| 5h           | -1.88                                     | -8.15                              | - | -              | -                         | Hem601, Phe126, Ile131,<br>Leu376, Met508                            | Hydrophobic                                                  |
| 5j           | -3.16                                     | -9.70                              | 1 | Tyr132         | Hem601,<br>Tyr188         | Hem601, Tyr118, Ile131,<br>Tyr132, Leu376, Met508                    | Aromatic,<br>Hydrophobic                                     |
| 5k           | -2.11                                     | -9.41                              | 1 | Tyr64          | -                         | Hem601, Tyr118, Ile131,<br>Leu376, Met508                            | Hydrophobic                                                  |
| 5p           | -3.65                                     | -8.76                              | 1 | Tyr132         | Hem601                    | Hem601, Ile131, Tyr132,<br>Thr311, Leu376, Met508                    | Aromatic,<br>Hydrophobic                                     |
| 5r           | -3.38                                     | -11.15                             | - | -              | Hem601                    | Hem601, Tyr118, Thr122,<br>Ile131, Tyr132, Thr311,<br>Leu376, Met508 | Aromatic,<br>Fe binding,<br>Hydrophobic                      |
| 5t           | -3.47                                     | -11.28                             | 1 | Hem601         | Hem601                    | Hem601, Tyr118, Phe126,<br>Ile131, Tyr132, Thr311,<br>Leu376         | Hydrogen<br>bond,<br>Aromatic,<br>Fe binding,<br>Hydrophobic |
| 5w           | -2.74                                     | -7.82                              | - | -              | -                         | Hem601, Tyr122, Phe126,<br>Leu376, Met508                            | Hydrophobic                                                  |
| 6b           | -1.27                                     | -8.73                              | 1 | Tyr64          | -                         | Hem601, Tyr118, Ile131,<br>Leu376, Met508                            | Hydrophobic                                                  |
| 6c           | -2.55                                     | -11.02                             | 1 | Hem601         | Tyr188,<br>Hem601         | Hem601, Tyr118, Tyr122,<br>Ile131, Tyr132, Phe233,<br>Leu376, Met508 | Hydrogen<br>bond,<br>Aromatic,<br>Hydrophobic                |
| 6d           | -2.97                                     | -9.72                              | 2 | Tyr64, Tyr132  | Hem601                    | Hem601, Tyr118, Tyr132,<br>Leu376, Met508                            | Aromatic,<br>Hydrophobic                                     |
| 6g           | -1.27                                     | -10.88                             | 1 | Tyr118         | Tyr132,<br>Hem601         | Hem601, Ile131, Tyr131,<br>Phe126, Ile304, Leu376,<br>Met508         | Aromatic,<br>Hydrophobic                                     |
| Ketoconazole | -                                         | -8.23                              | 1 | Tyr64          | Hem601                    | Tyr118, Ile131, Tyr132,<br>Hem601, Ile304, Leu300,<br>Leu376, Met508 | Aromatic,<br>Hydrophobic                                     |

\*Number of hydrogen bonds.

**Table S4. Drug likeness predictions of tested compounds.**

| No | MW     | Number of HBA <sup>a</sup> | Number of HBD <sup>b</sup> | Log $P_{o/w}$ (iLOGP) <sup>c</sup> | Log S <sup>d</sup> | TPSA <sup>e</sup> | BBB permeant <sup>f</sup> | Lipinski, Ghose, Veber, Egan, and Muegge violations | Bioavailability Score | Drug-likeness model score |
|----|--------|----------------------------|----------------------------|------------------------------------|--------------------|-------------------|---------------------------|-----------------------------------------------------|-----------------------|---------------------------|
| 5a | 215.27 | 1                          | 2                          | 1.55                               | Moderately soluble | 82.94             | No                        | 0                                                   | 0.55                  | -1.71                     |
| 5b | 245.30 | 2                          | 2                          | 1.87                               | Moderately soluble | 92.17             | No                        | 0                                                   | 0.55                  | -1.16                     |
| 5c | 245.30 | 2                          | 2                          | 1.87                               | Moderately soluble | 92.17             | No                        | 0                                                   | 0.55                  | -1.16                     |
| 5d | 229.30 | 1                          | 2                          | 1.75                               | Moderately soluble | 82.94             | No                        | 0                                                   | 0.55                  | -1.57                     |
| 5e | 233.26 | 2                          | 2                          | 1.66                               | Moderately soluble | 60.17             | No                        | 0                                                   | 0.55                  | -1.38                     |
| 5f | 259.33 | 2                          | 2                          | 2.08                               | Moderately soluble | 92.17             | No                        | 0                                                   | 0.55                  | -0.57                     |
| 5g | 273.35 | 2                          | 1                          | 2.54                               | Moderately soluble | 81.31             | No                        | 0                                                   | 0.55                  | -0.90                     |
| 5h | 363.48 | 2                          | 1                          | 3.62                               | Poorly soluble     | 67.32             | Yes                       | 0                                                   | 0.55                  | -0.29                     |
| 5i | 273.35 | 2                          | 2                          | 2.45                               | Moderately soluble | 78.18             | Yes                       | 0                                                   | 0.55                  | -0.51                     |
| 5j | 287.38 | 2                          | 1                          | 2.89                               | Moderately soluble | 67.32             | Yes                       | 0                                                   | 0.55                  | -0.83                     |
| 5k | 257.35 | 1                          | 1                          | 2.61                               | Moderately soluble | 58.09             | Yes                       | 0                                                   | 0.55                  | -1.42                     |
| 5l | 257.35 | 1                          | 1                          | 2.47                               | Moderately soluble | 68.95             | Yes                       | 0                                                   | 0.55                  | -1.22                     |
| 5m | 263.75 | 1                          | 2                          | 2.10                               | Moderately soluble | 82.94             | No                        | 0                                                   | 0.55                  | -0.74                     |
| 5n | 259.33 | 2                          | 2                          | 2.16                               | Moderately soluble | 92.17             | No                        | 0                                                   | 0.55                  | -0.96                     |
| 5o | 243.33 | 1                          | 2                          | 1.96                               | Moderately soluble | 82.94             | No                        | 0                                                   | 0.55                  | -1.01                     |
| 5p | 243.33 | 1                          | 1                          | 2.17                               | Moderately soluble | 72.08             | Yes                       | 0                                                   | 0.55                  | -1.48                     |
| 5q | 243.33 | 1                          | 1                          | 2.17                               | Moderately soluble | 72.08             | Yes                       | 0                                                   | 0.55                  | -1.47                     |
| 5r | 257.35 | 1                          | 1                          | 2.34                               | Moderately soluble | 72.08             | Yes                       | 0                                                   | 0.55                  | -1.42                     |
| 5s | 229.30 | 1                          | 2                          | 1.78                               | Moderately soluble | 82.94             | No                        | 0                                                   | 0.55                  | -0.88                     |
| 5t | 271.38 | 1                          | 1                          | 2.82                               | Moderately soluble | 58.09             | Yes                       | 0                                                   | 0.55                  | -1.34                     |
| 5u | 257.35 | 1                          | 2                          | 2.31                               | Moderately soluble | 68.95             | Yes                       | 0                                                   | 0.55                  | -0.96                     |

|    |        |   |   |      |                    |       |     |   |      |       |
|----|--------|---|---|------|--------------------|-------|-----|---|------|-------|
| 5v | 259.33 | 2 | 2 | 2.15 | Moderately soluble | 78.18 | Yes | 0 | 0.55 | -1.09 |
| 5w | 243.33 | 1 | 1 | 2.17 | Moderately soluble | 72.08 | Yes | 0 | 0.55 | -1.48 |
| 5x | 270.35 | 2 | 2 | 2.15 | Moderately soluble | 81.31 | No  | 0 | 0.55 | -1.44 |

a) number of hydrogen bond acceptors; b) number of hydrogen bond donors; c) lipophilicity; d) Water solubility (SILICOS-IT [S=Soluble]); e) topological polar surface area ( $\text{\AA}^2$ ); f) Blood Brain Barrier permeant;

## $^1\text{H}$ -NMR AND $^{13}\text{C}$ -NMR OF COMPOUNDS

### Compound 5a

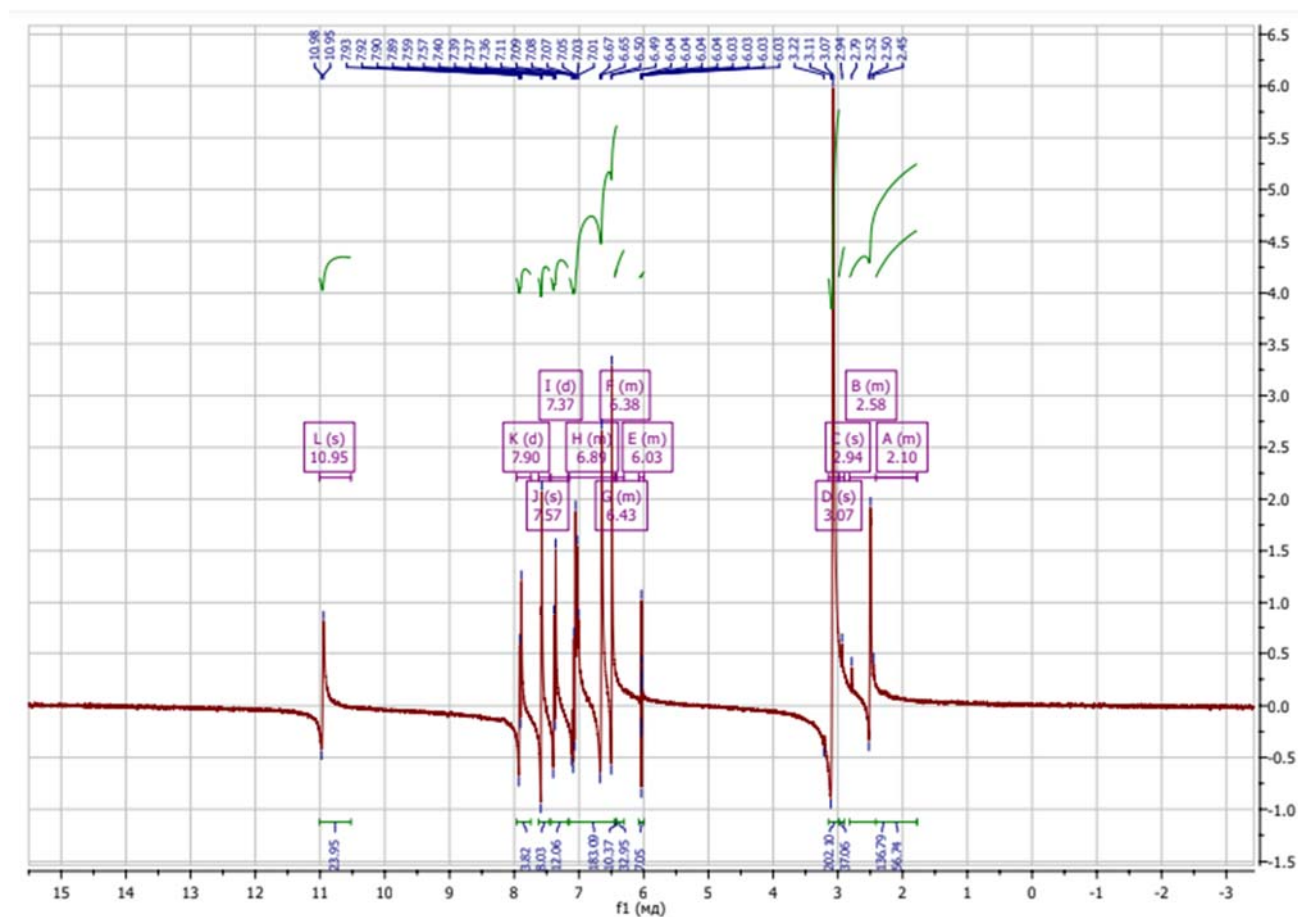

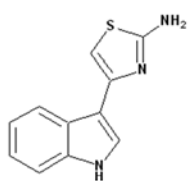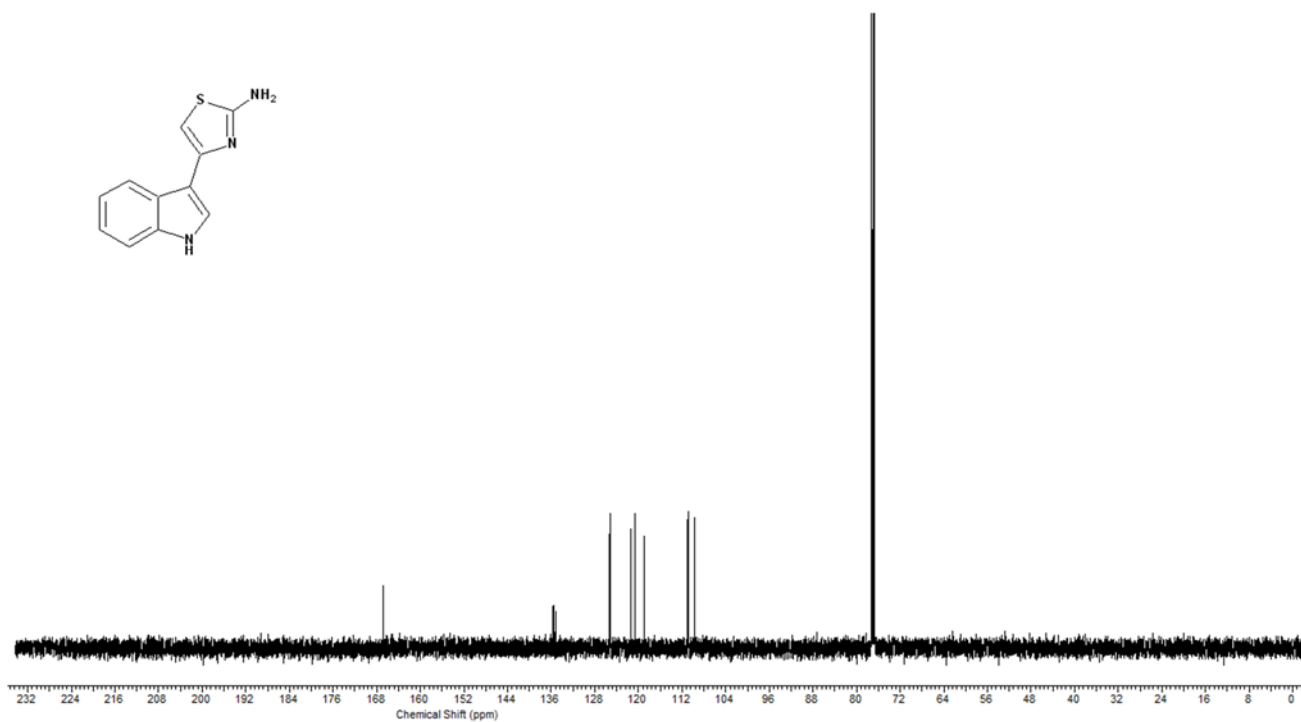

### Compound 5b

STOCK2S-03510

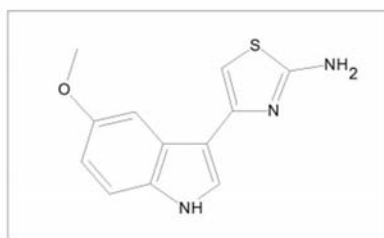

C12H11N3OS

245.305

301902  
PRBS70-5-0000

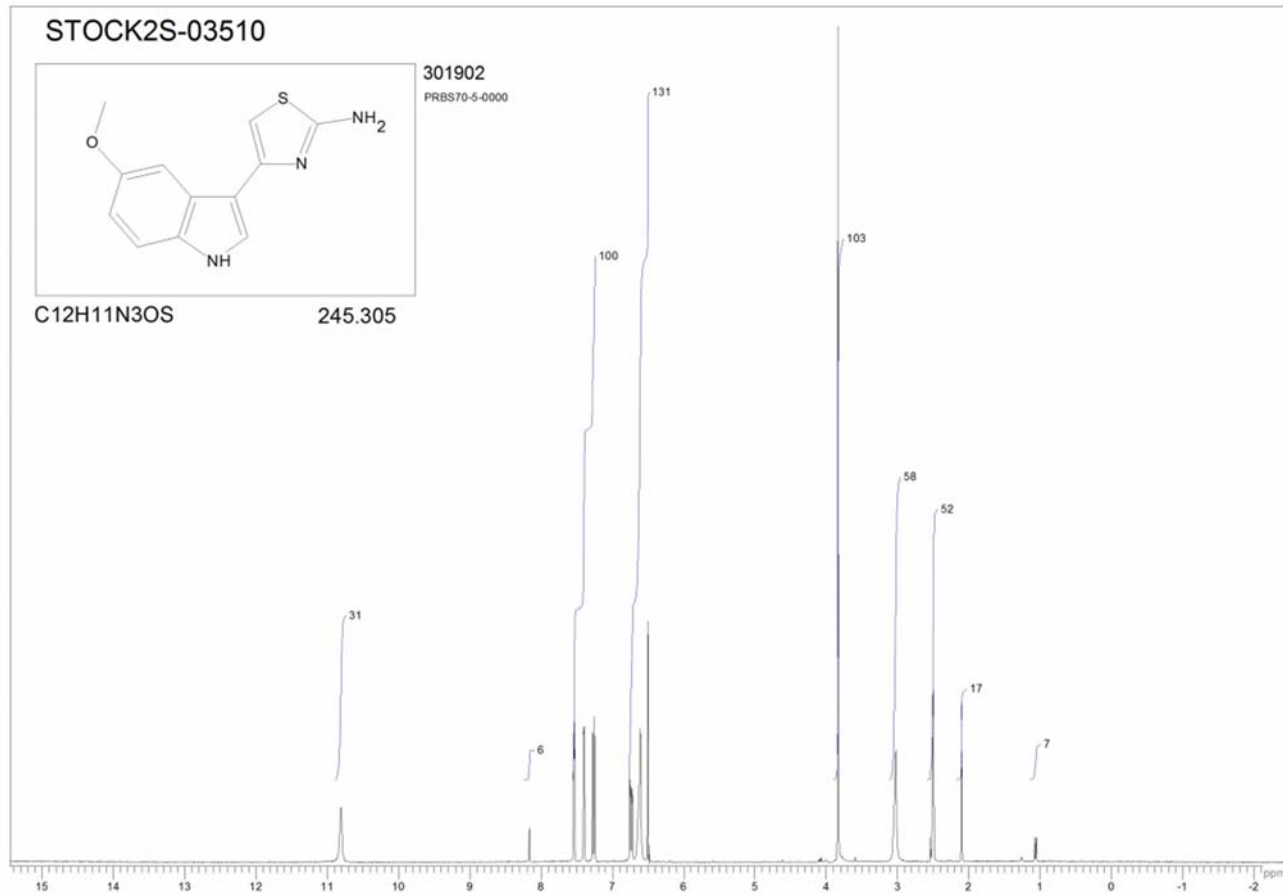

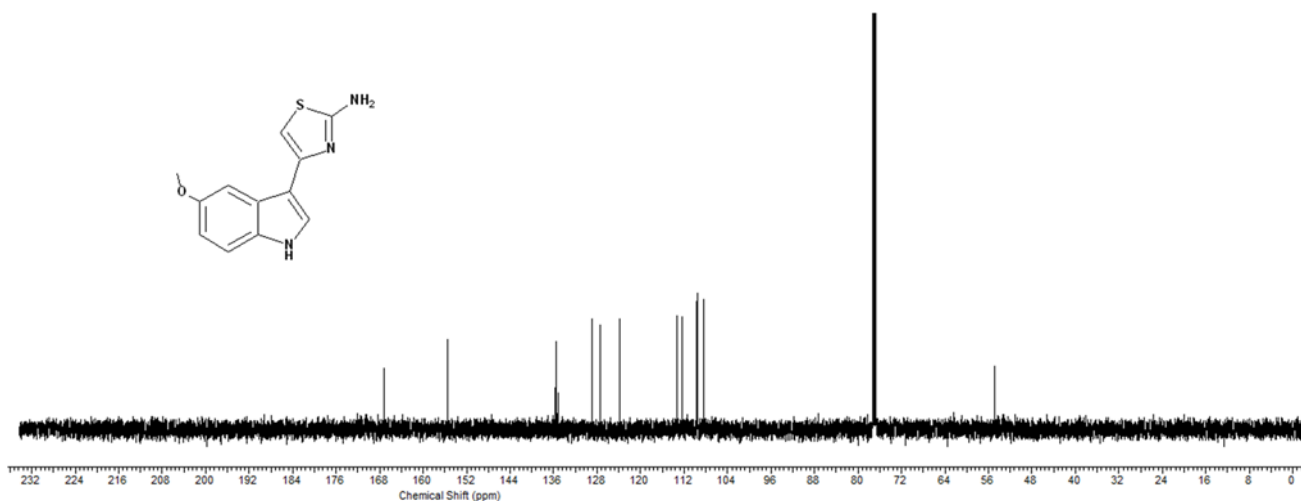

### Compound 5c

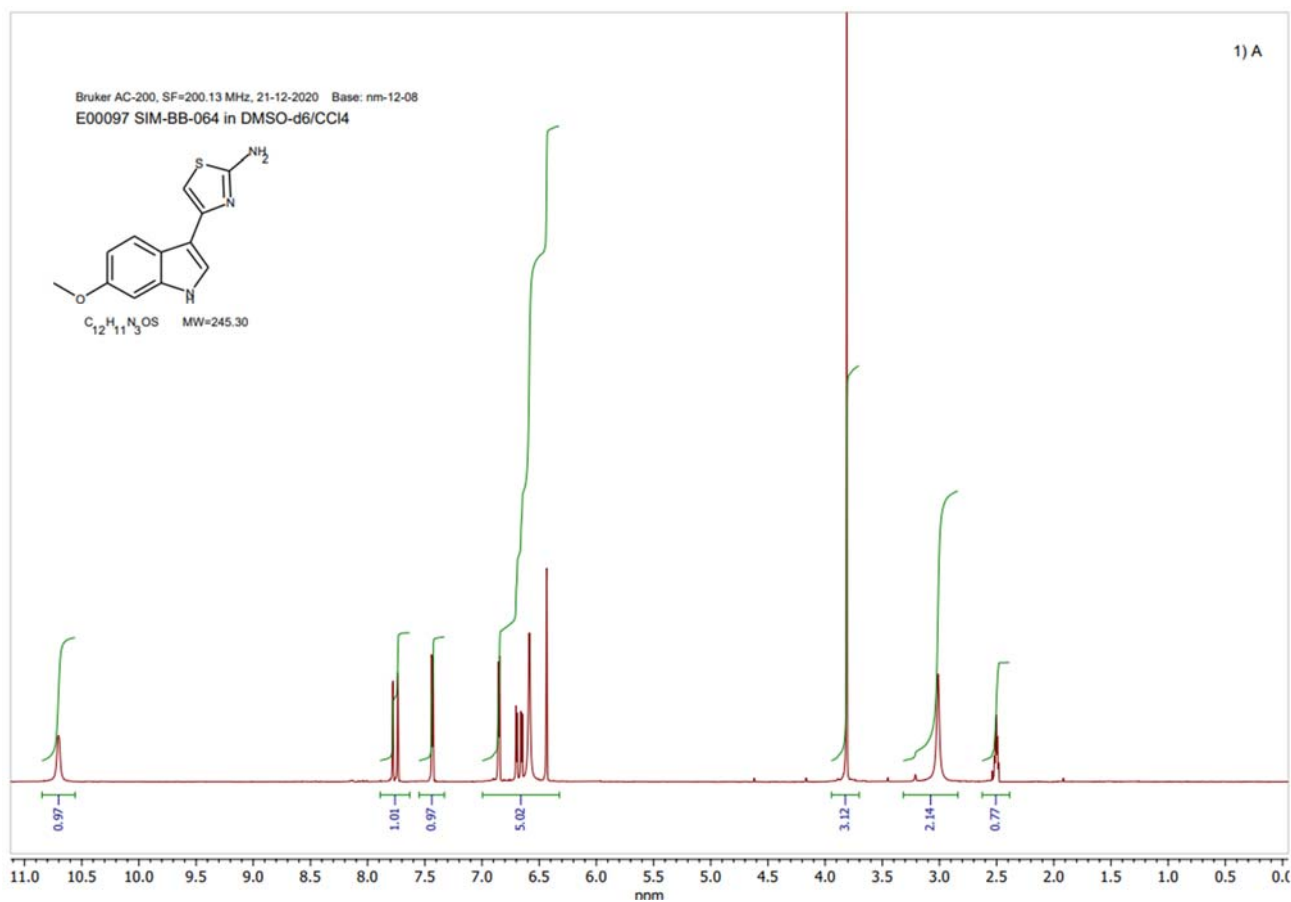

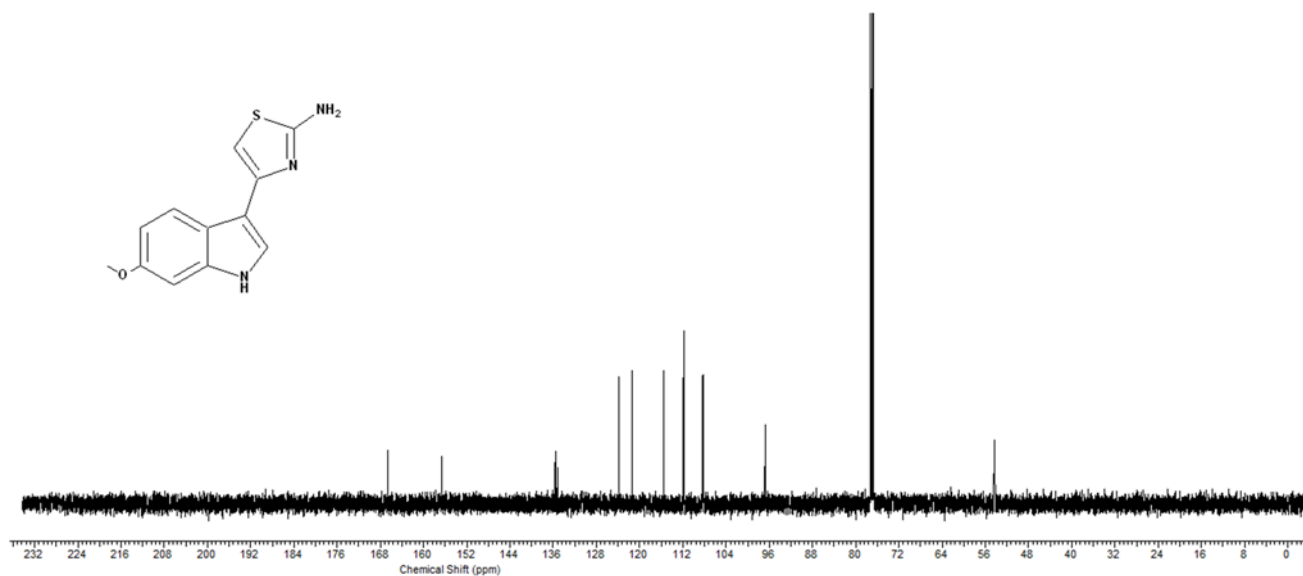

### Compound 5d

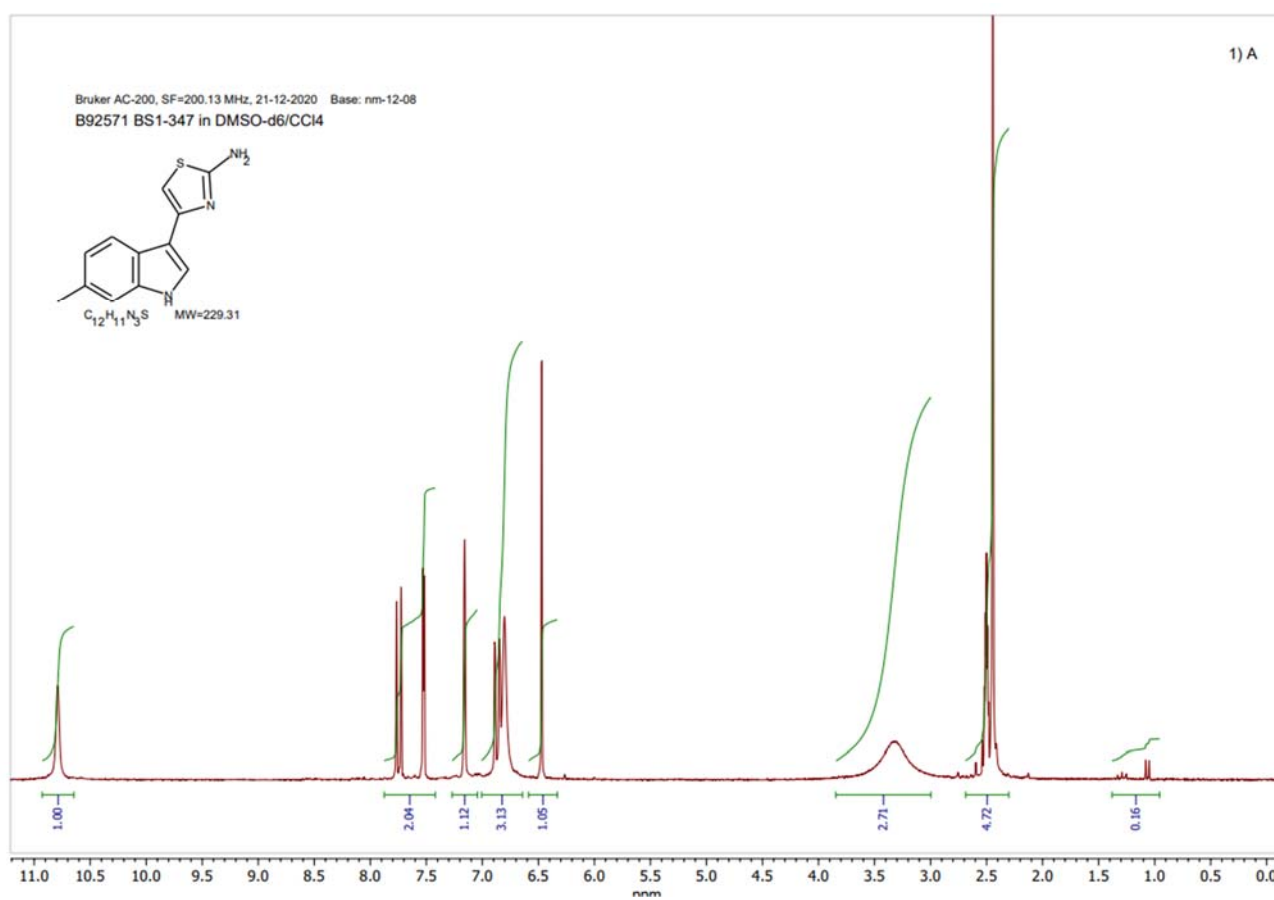



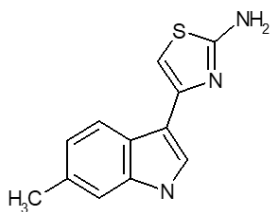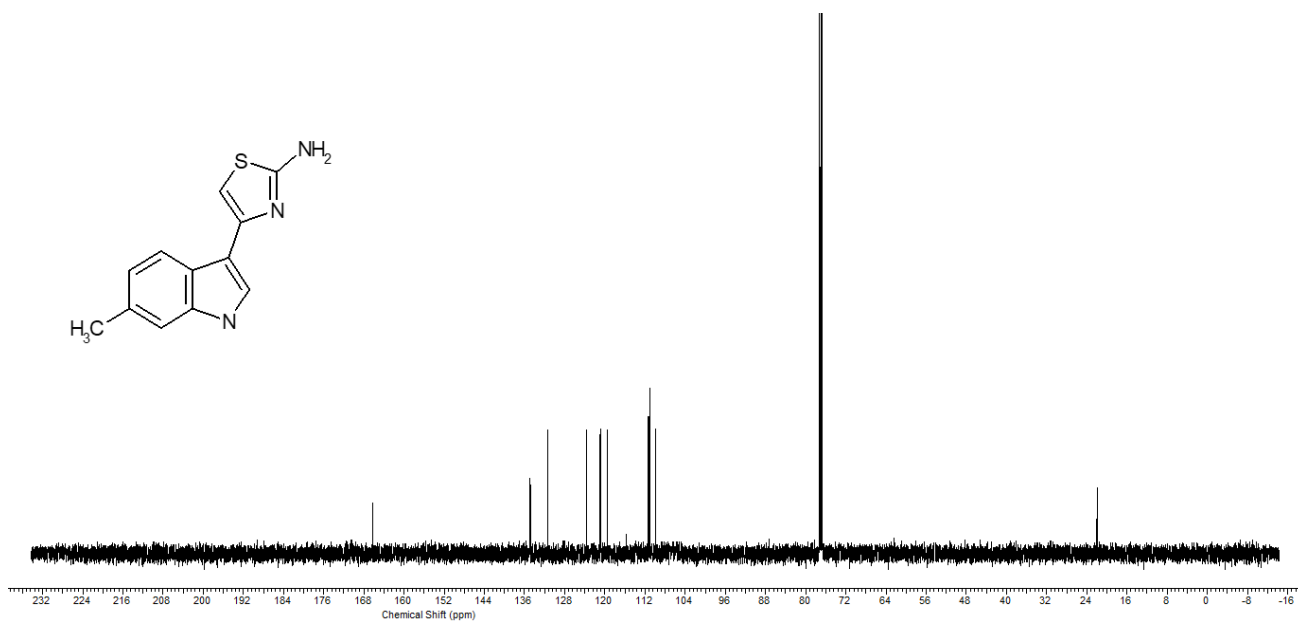

### Compound 5e

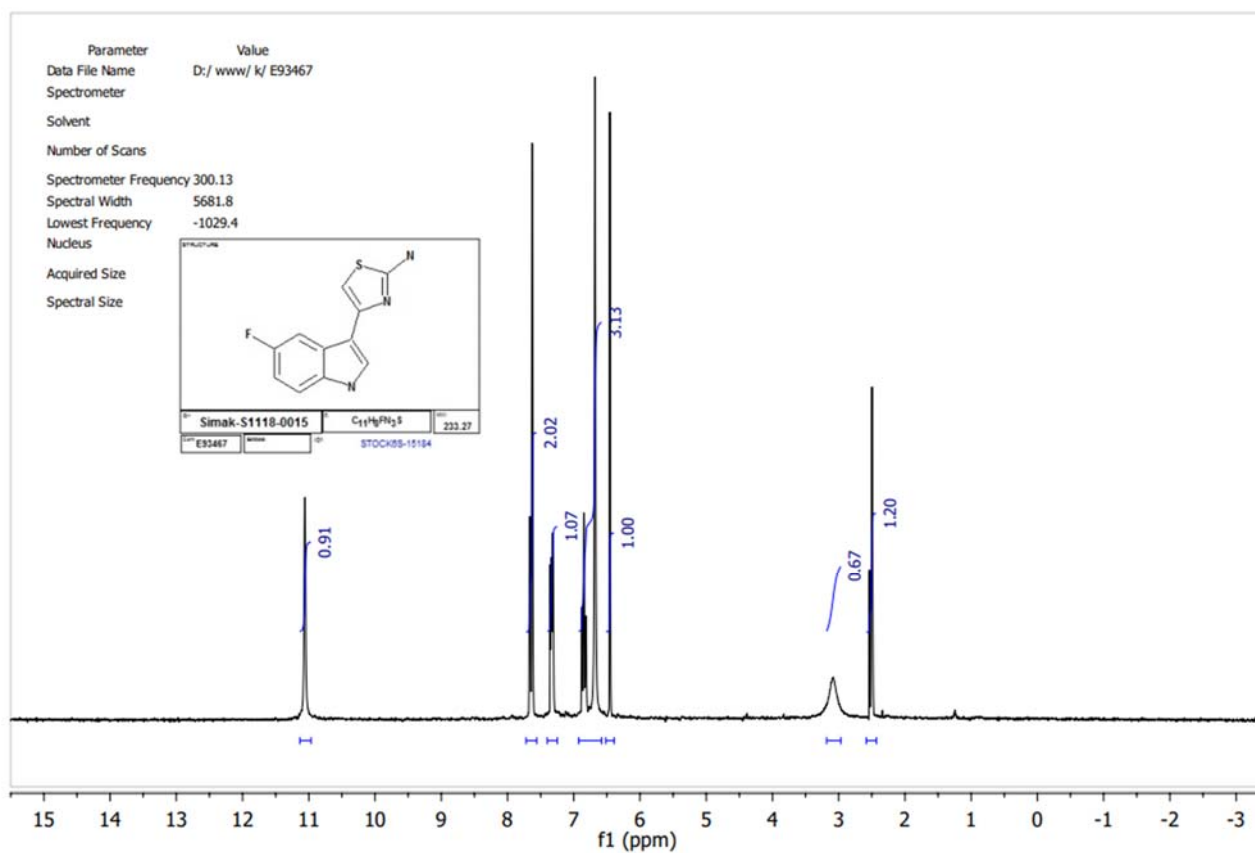

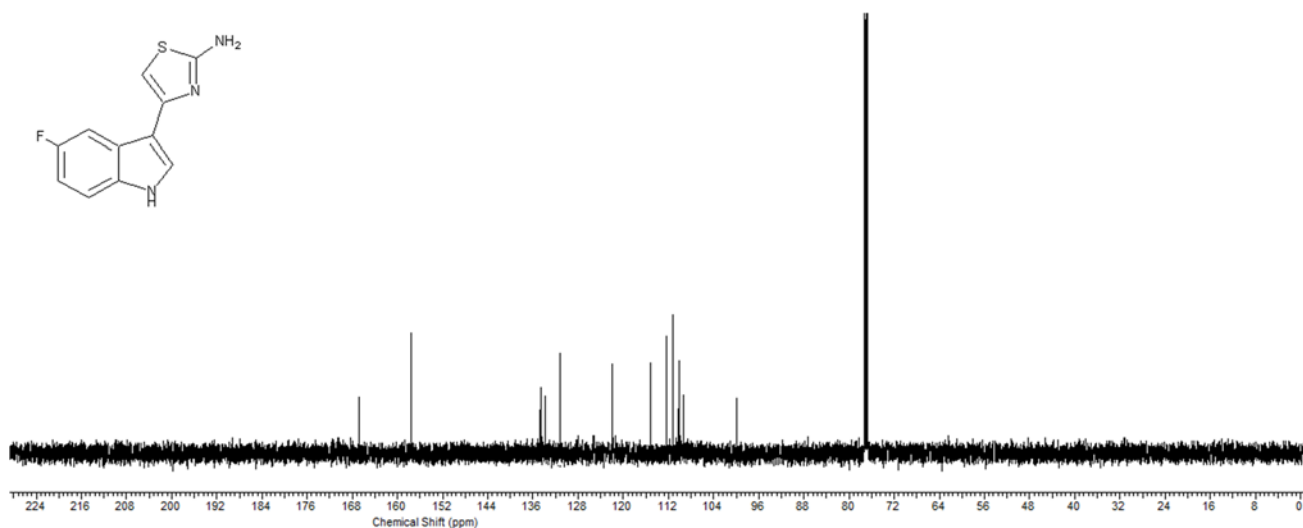

### Compound 5f

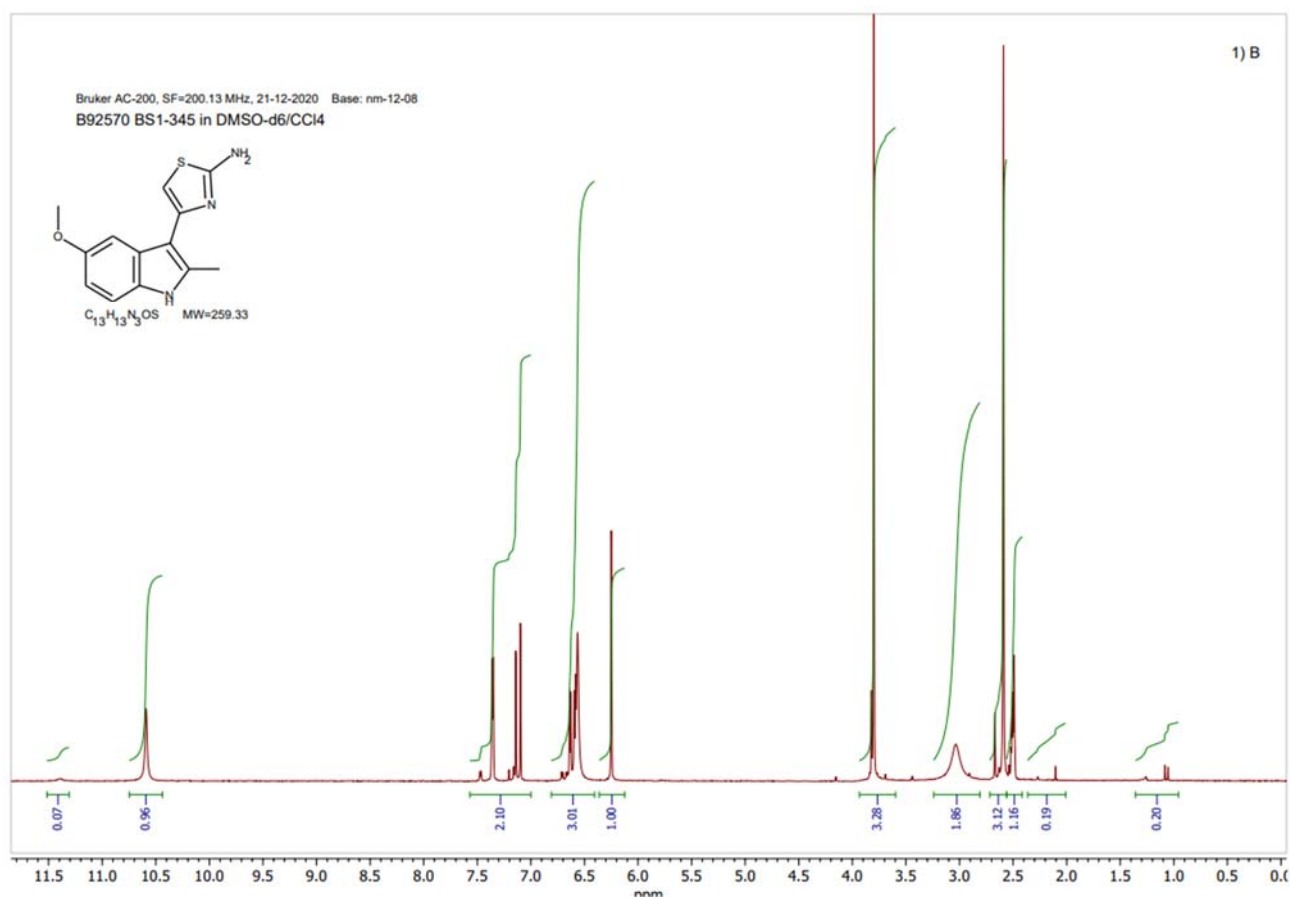

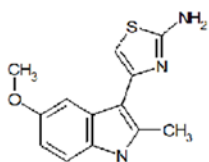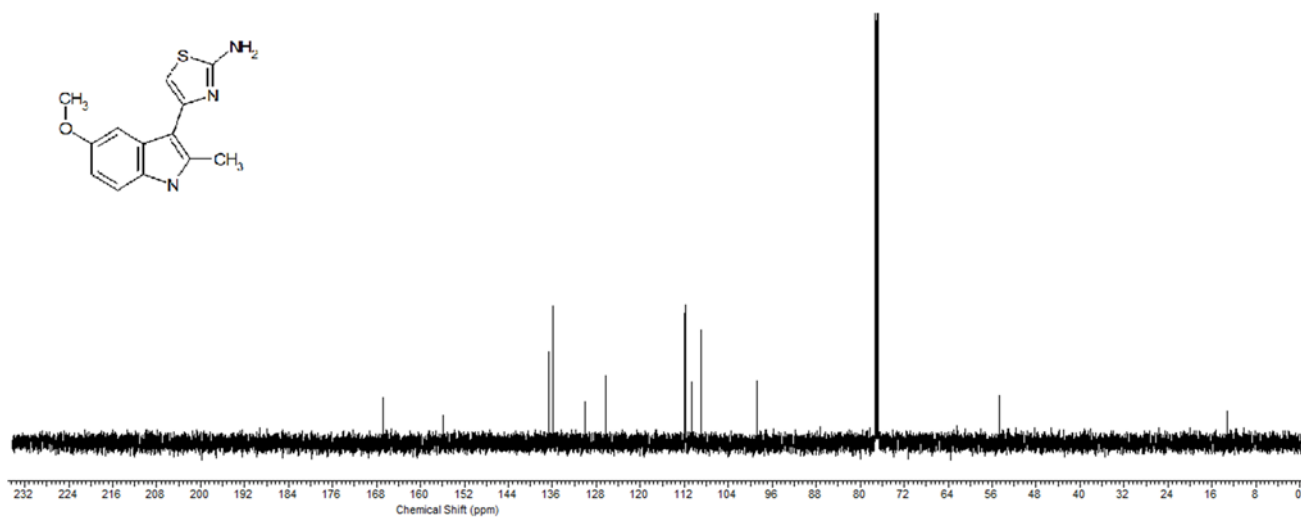

**Compound 5g**

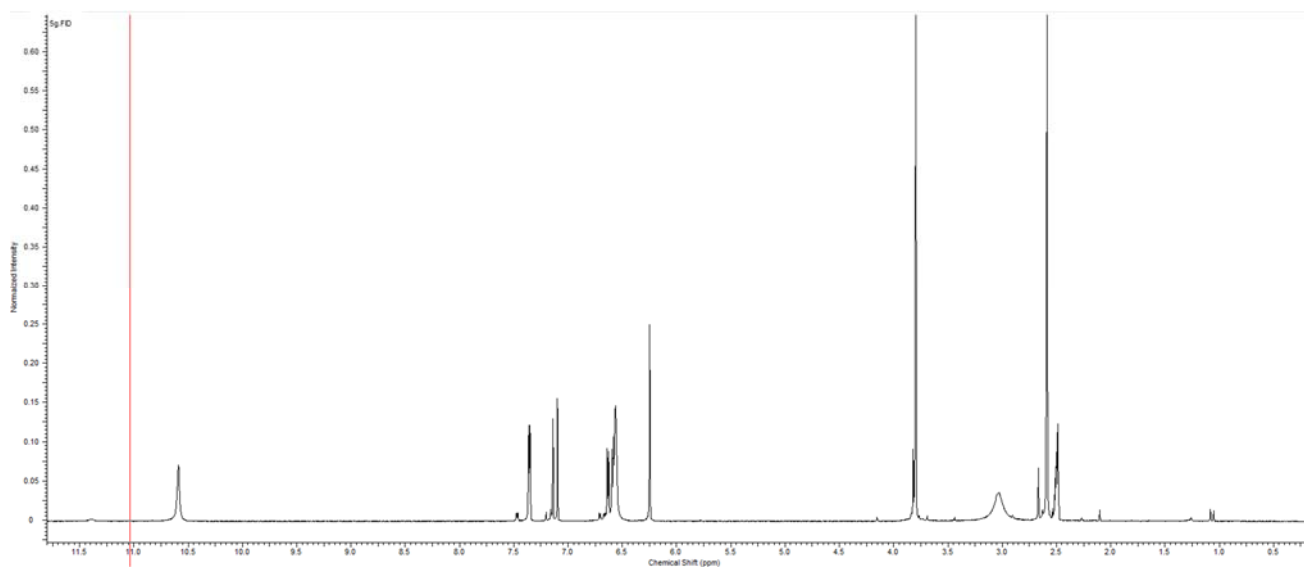

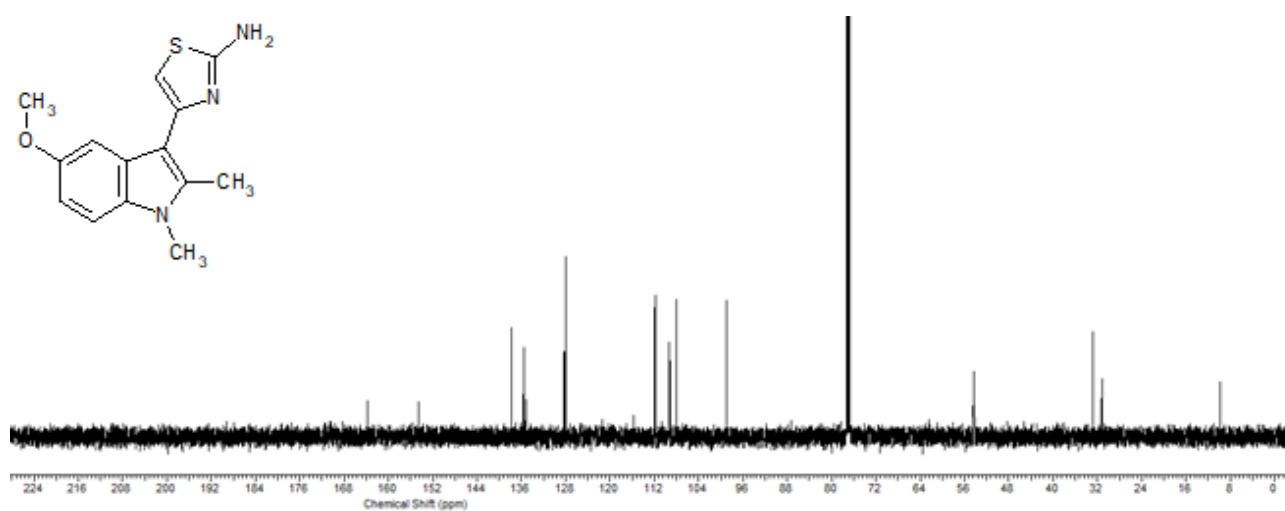

Compound 5h

STOCK3S-41583

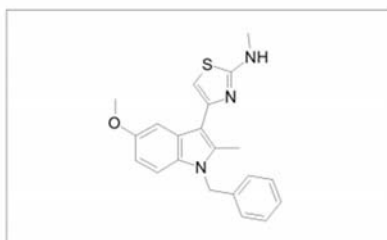

C<sub>21</sub>H<sub>21</sub>N<sub>3</sub>OS

363.48

C49843  
SIMAK-00699

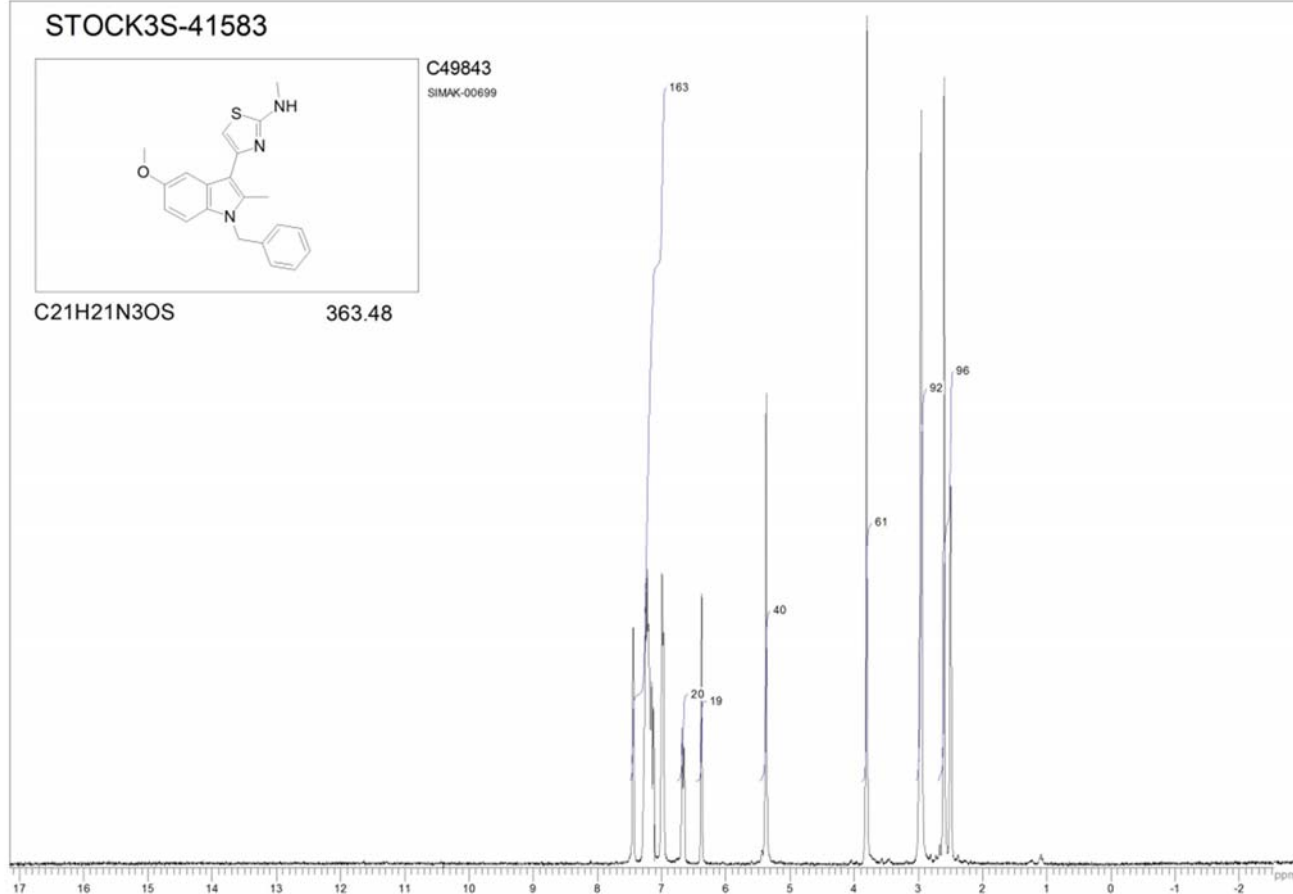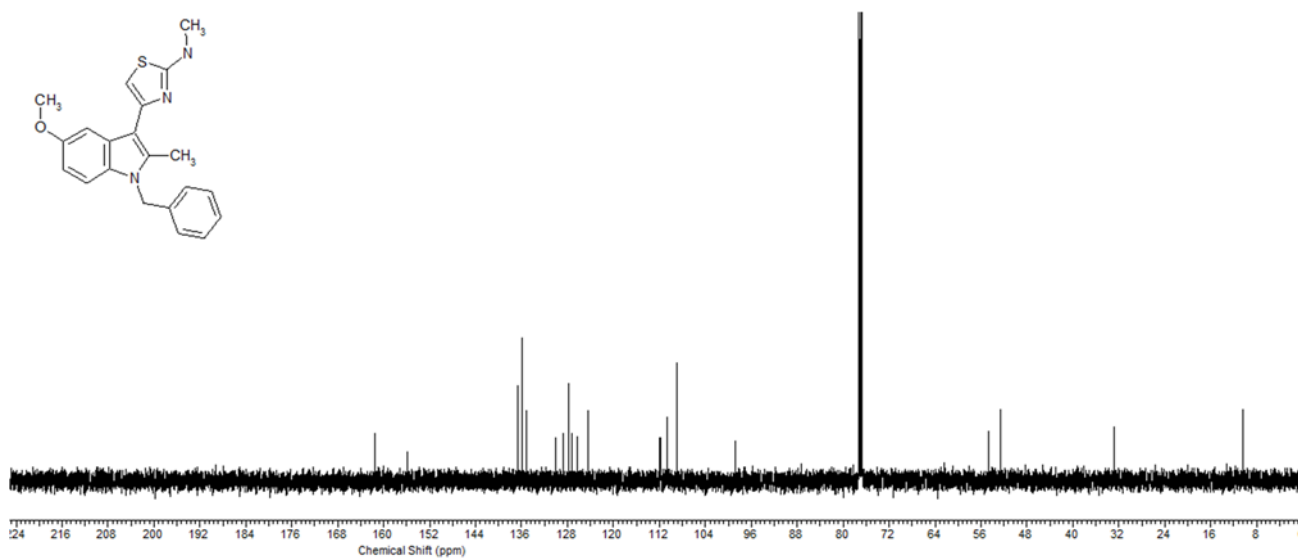

Compound 5i

STOCK3S-39004

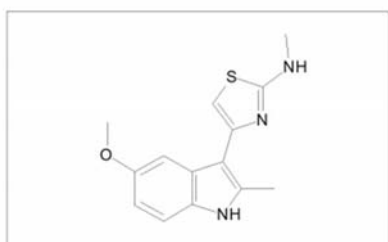

C<sub>14</sub>H<sub>15</sub>N<sub>3</sub>OS

273.359

C49844  
SIMAK-00700

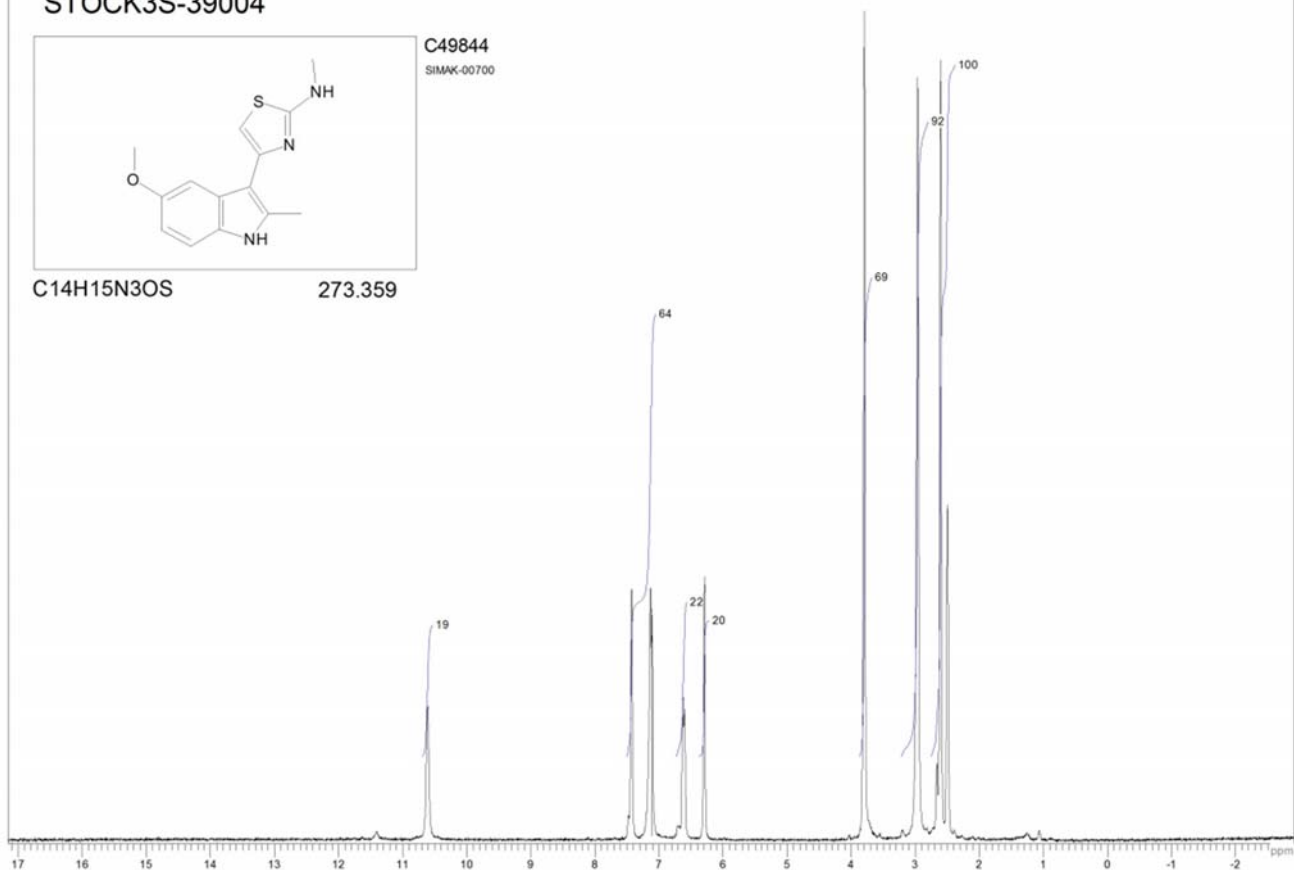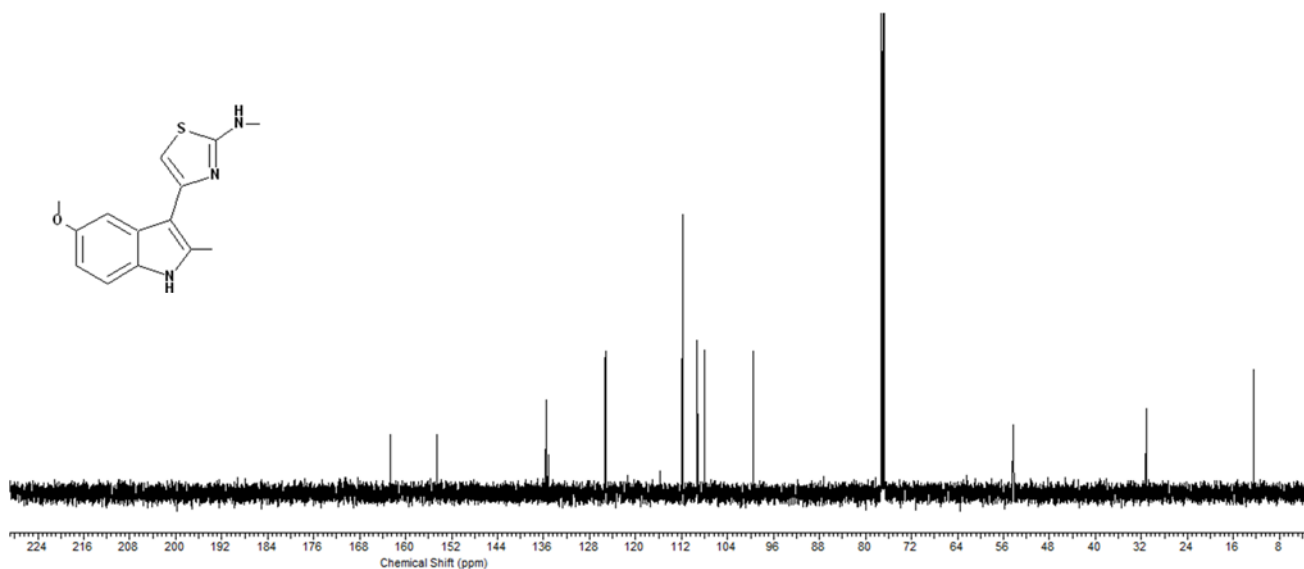

Compound 5j

CN1C=NC2=C1C(=C(C=C2)OC)C3=CC=CC=C3

|                                                               |         |
|---------------------------------------------------------------|---------|
| C <sub>15</sub> H <sub>17</sub> N <sub>3</sub> O <sub>5</sub> | 287.386 |
|---------------------------------------------------------------|---------|

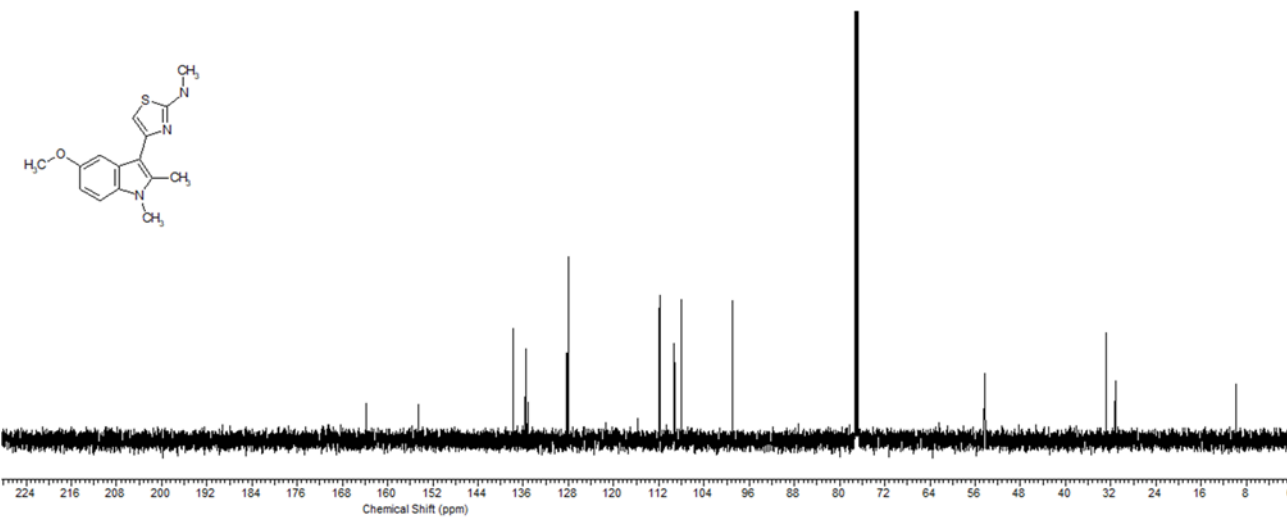

### Compound 5k

STOCK3S-39228

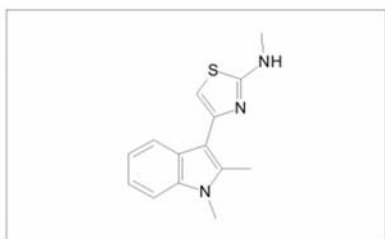

C<sub>14</sub>H<sub>15</sub>N<sub>3</sub>S

257.359

C49842  
SIMAK-00698

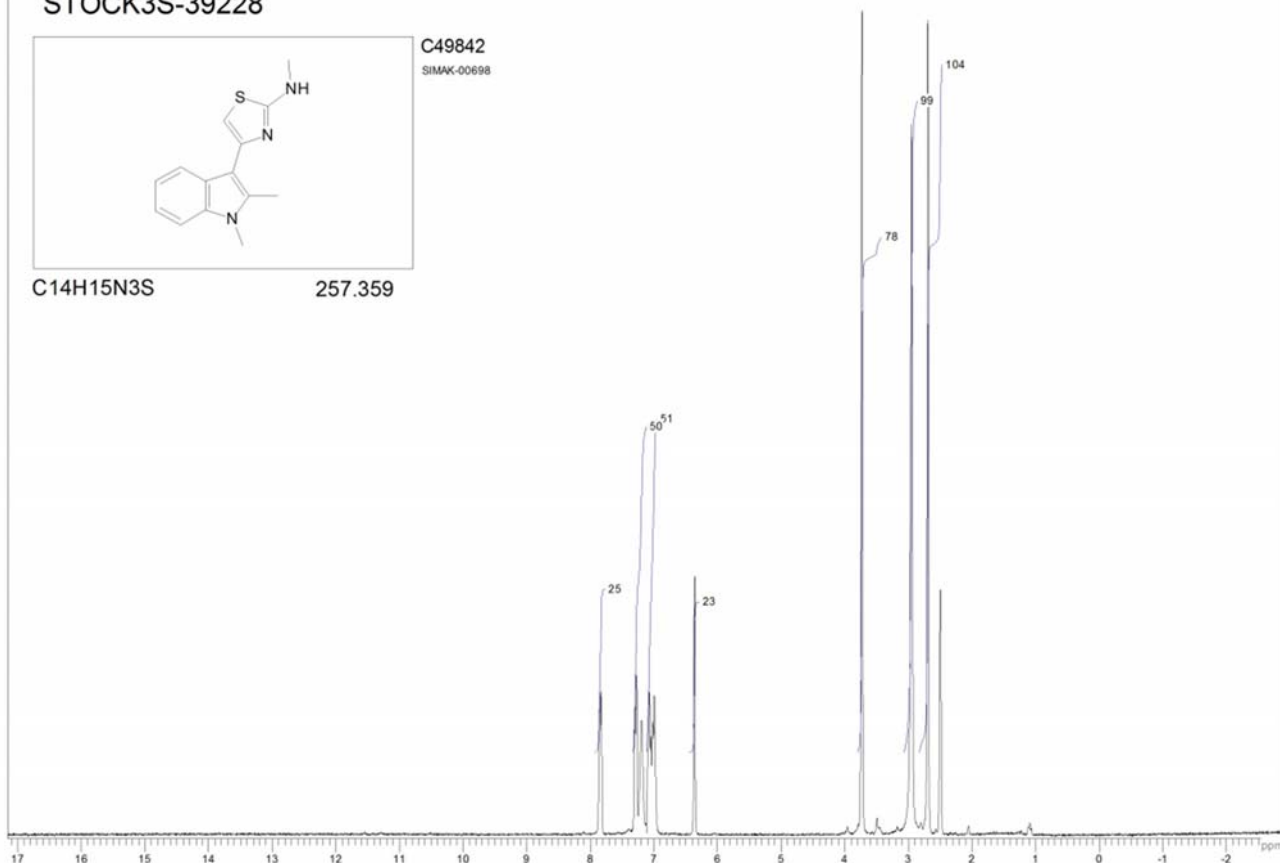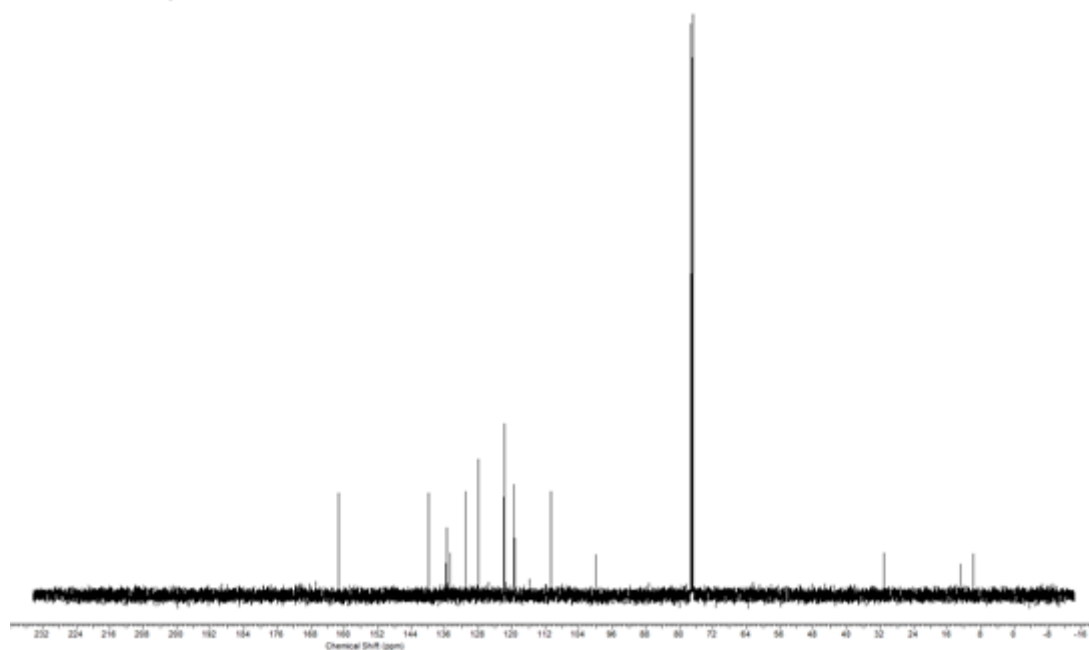

Compound 51



1) E

Bruker AC-200, SF=200.13 MHz, 21-12-2020 Base: nm-12-08  
E38916 SIMAK02-00431 in DMSO-d6/CCl4

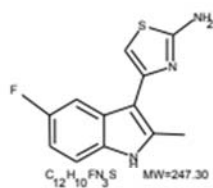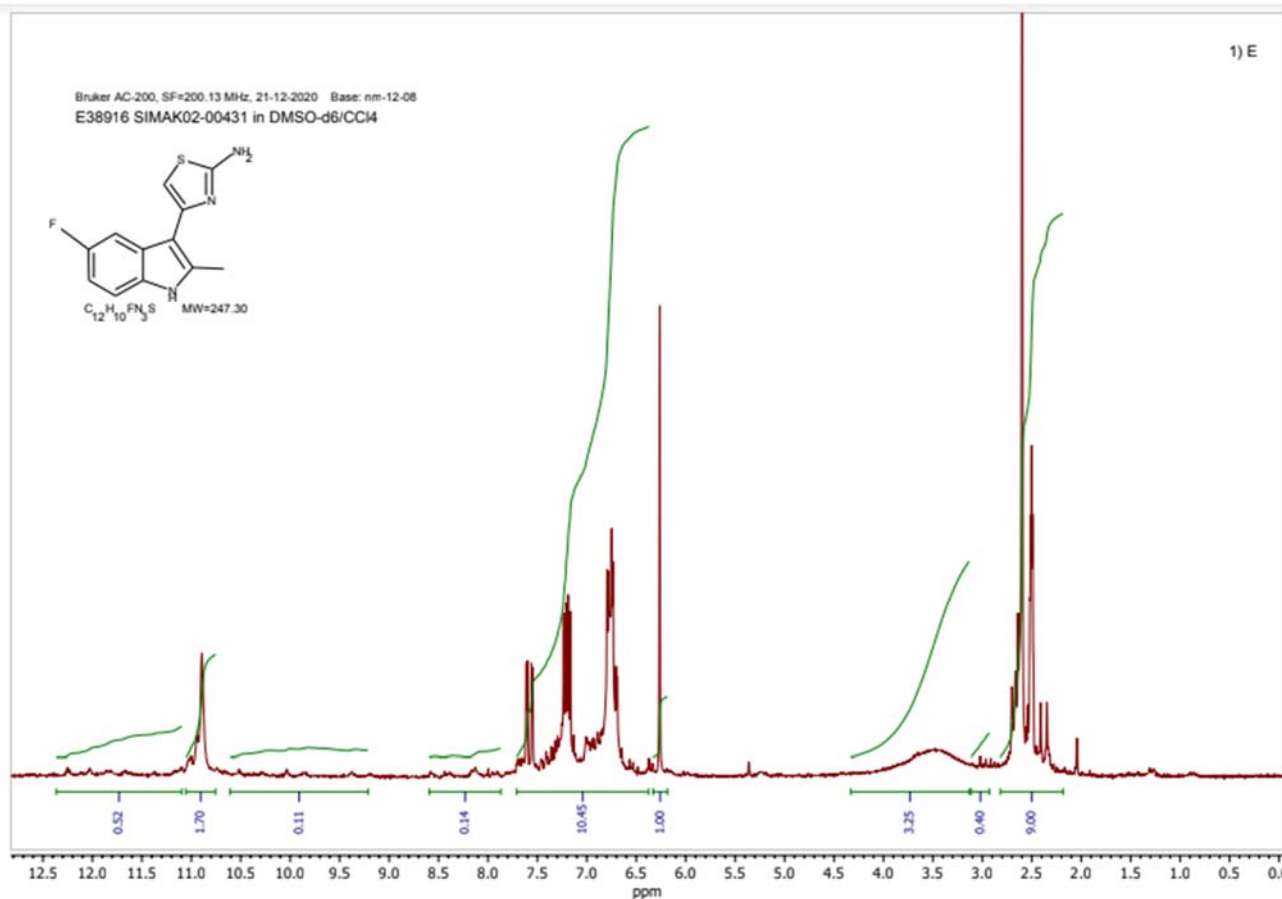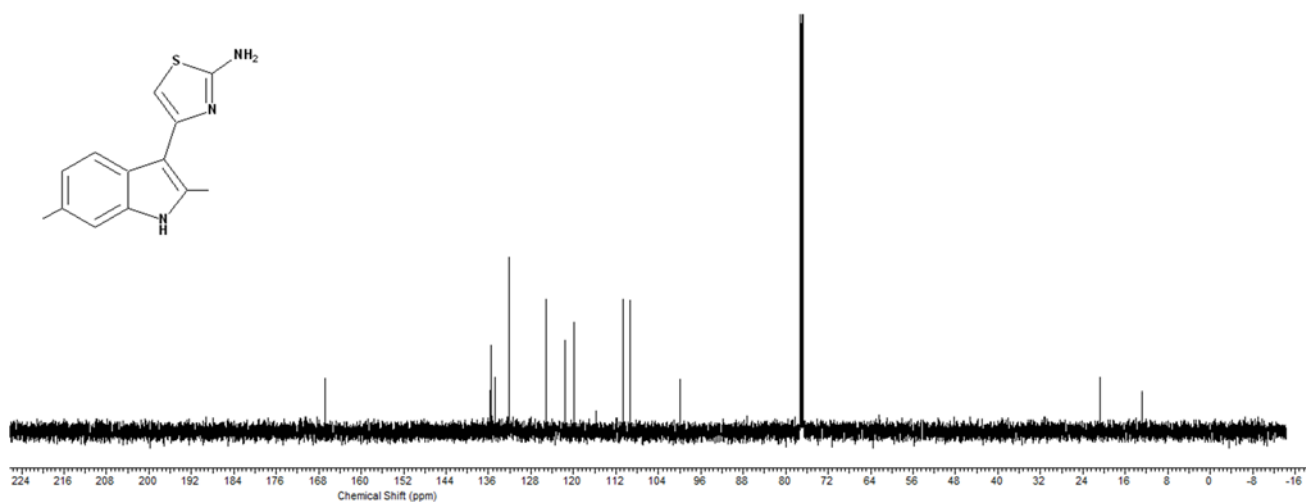

Compound 5m

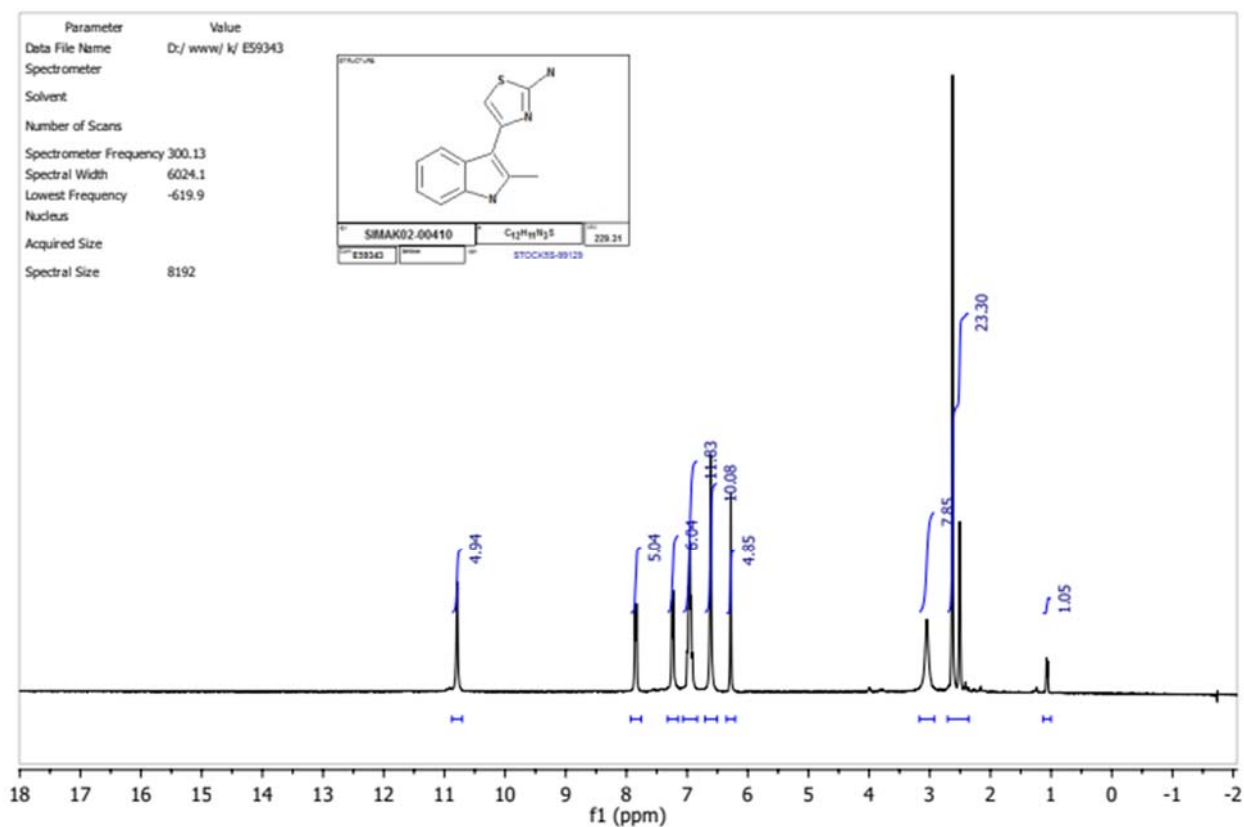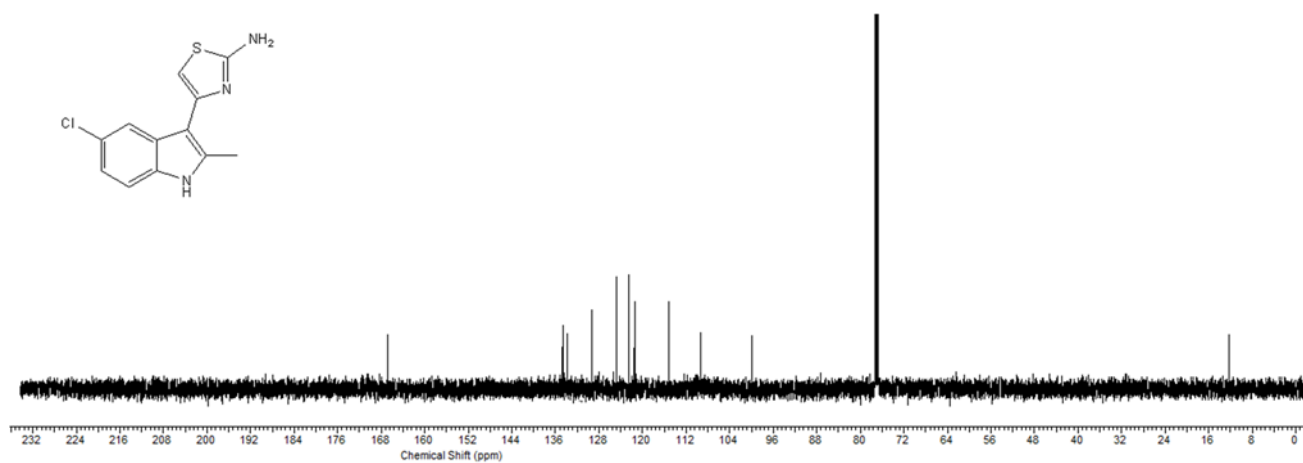

Compound 5n

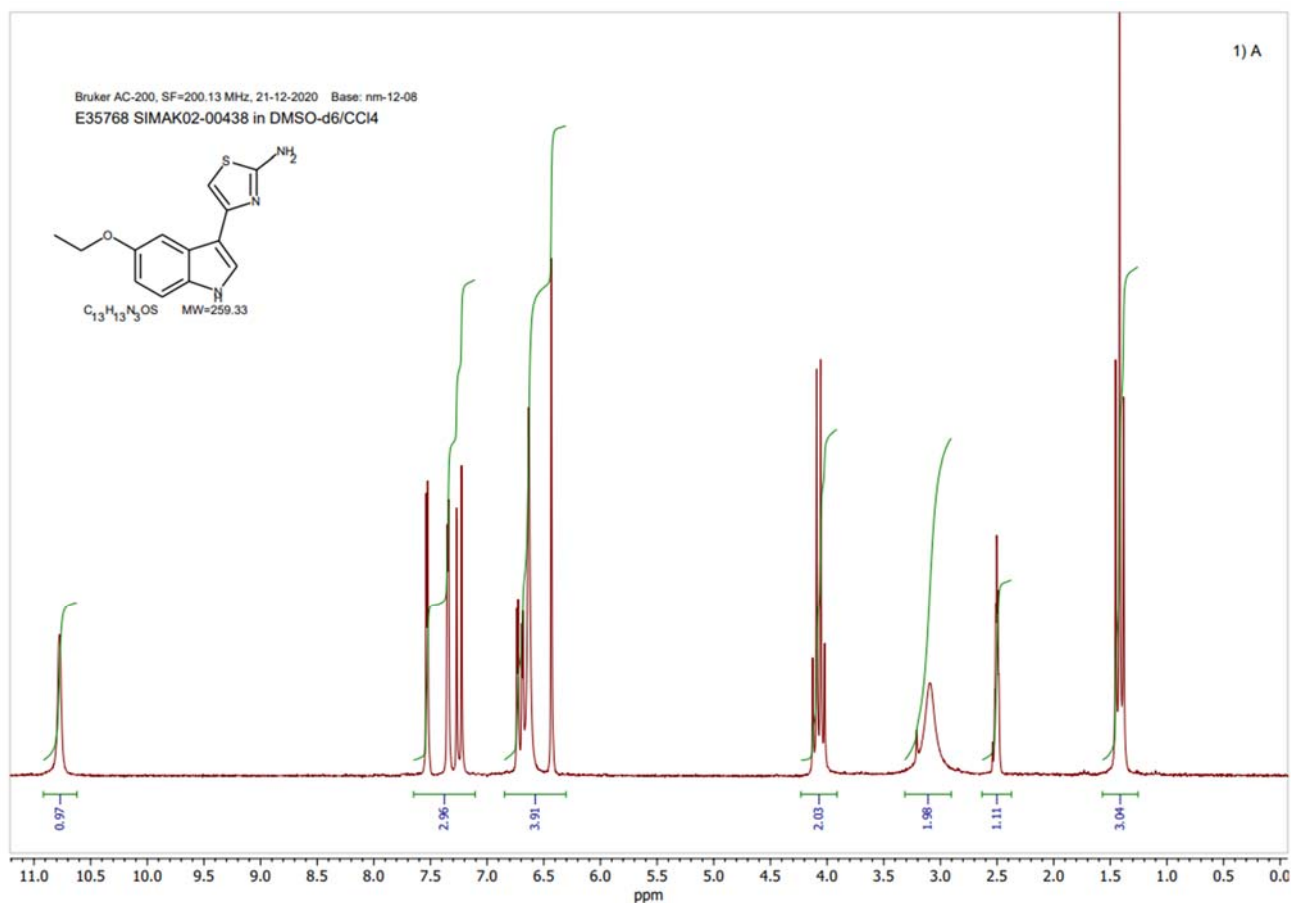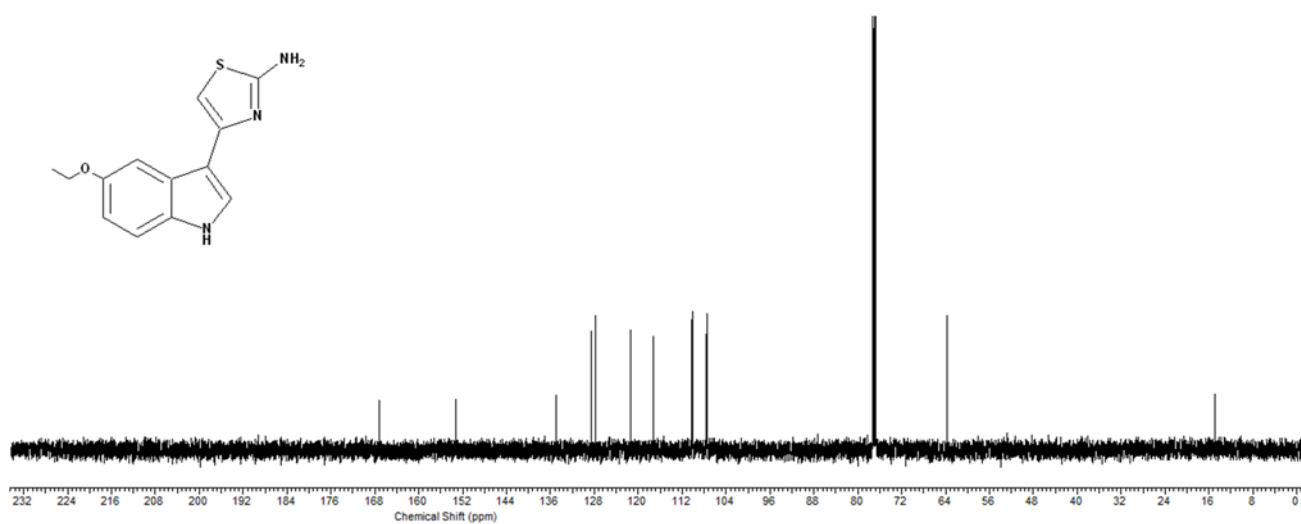

Compound 5o

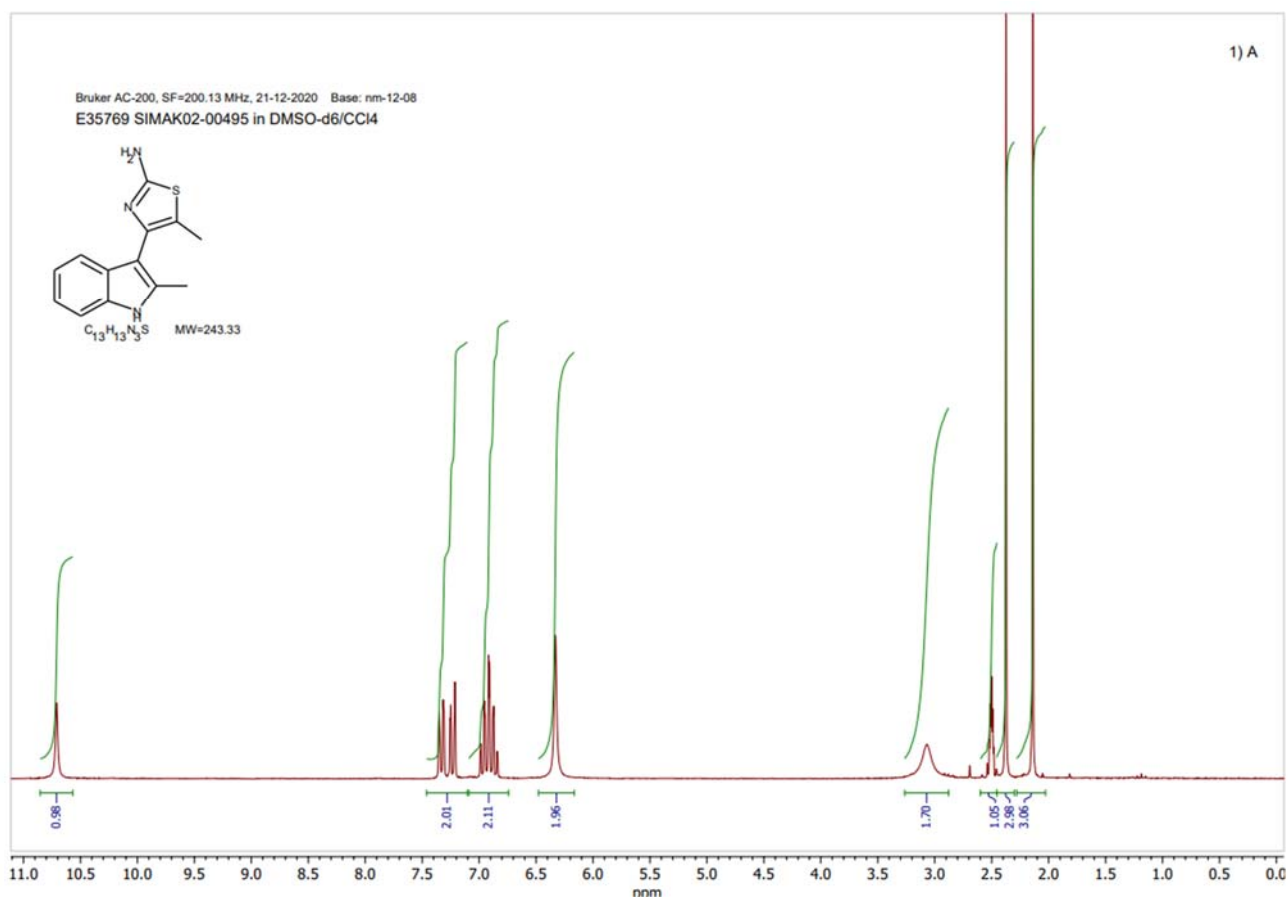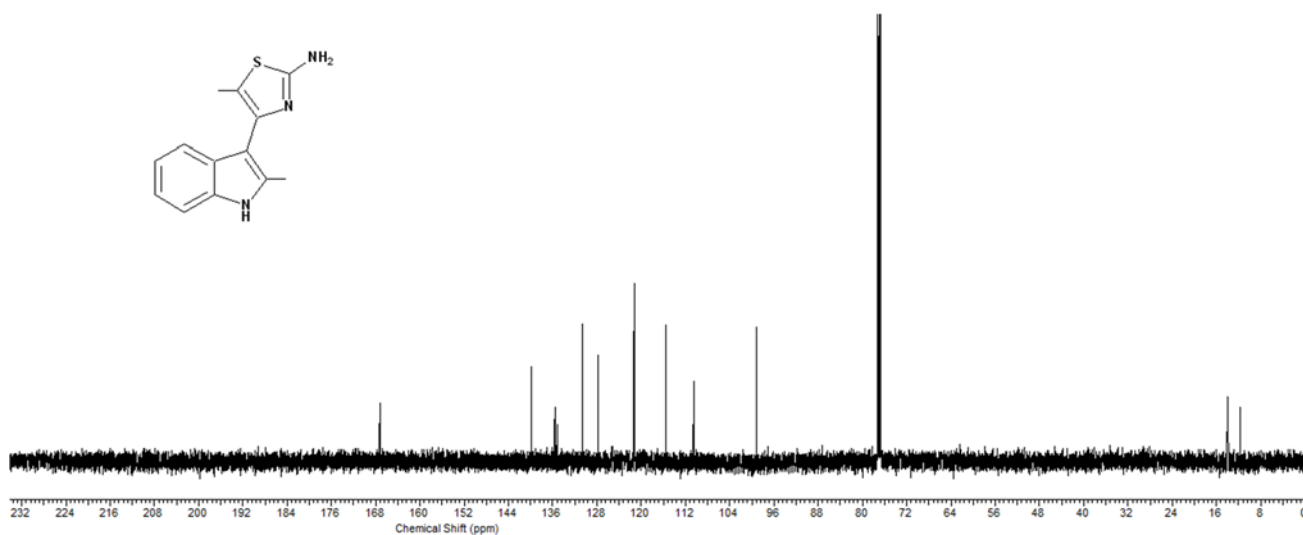

Compound 5p

1) A

Bruker AC-200, SF=200.13 MHz, 21-12-2020 Base: nm-12-08  
E38915 SIMAK02-00417 in DMSO-d6/CCl4

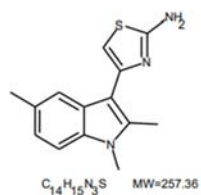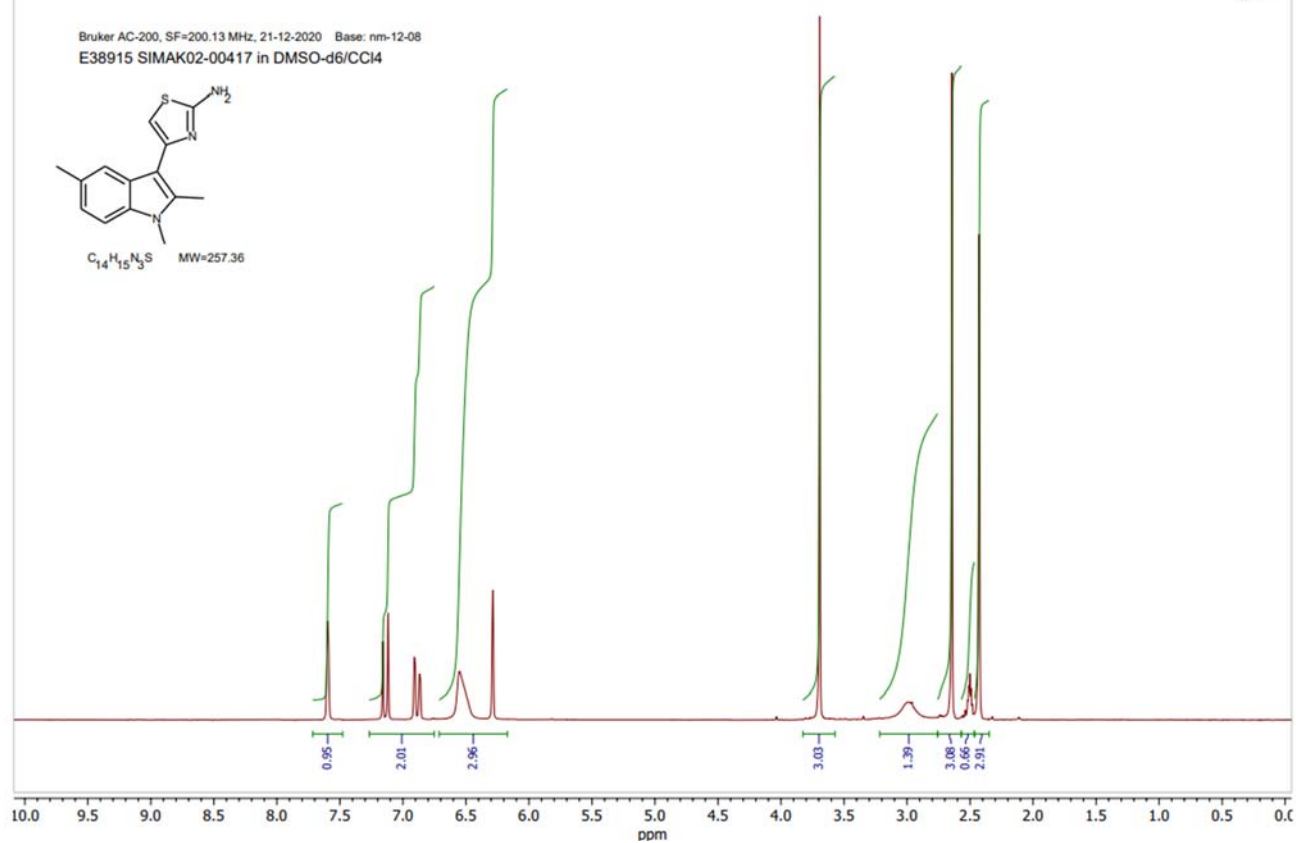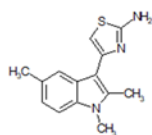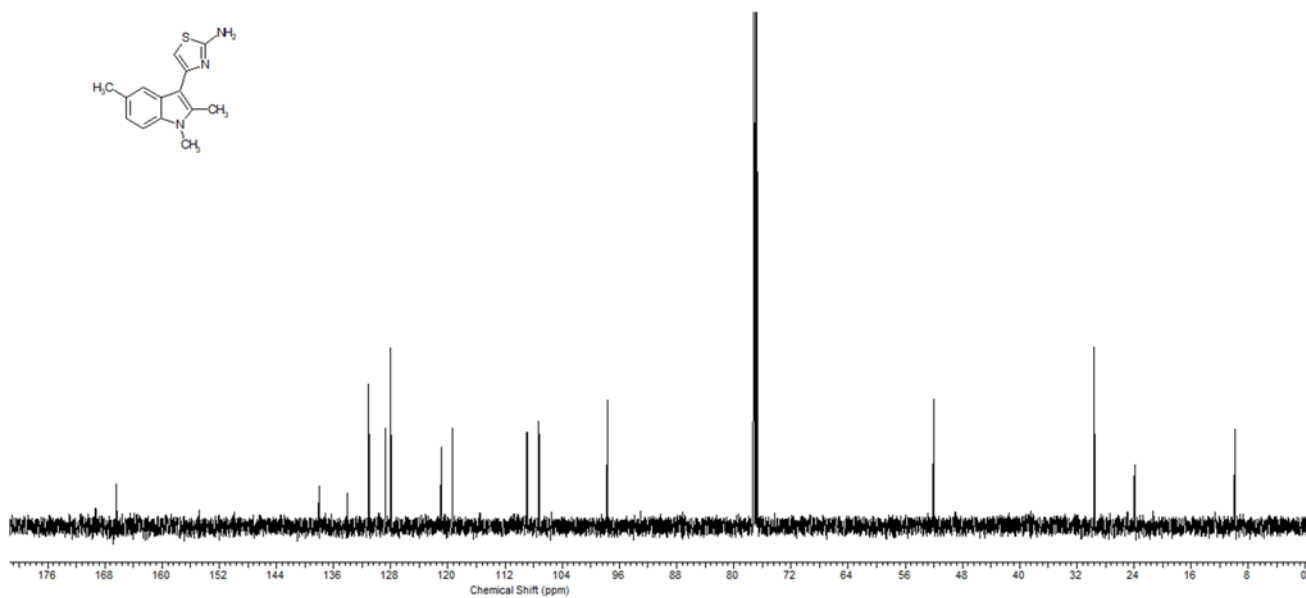

Compound 5q

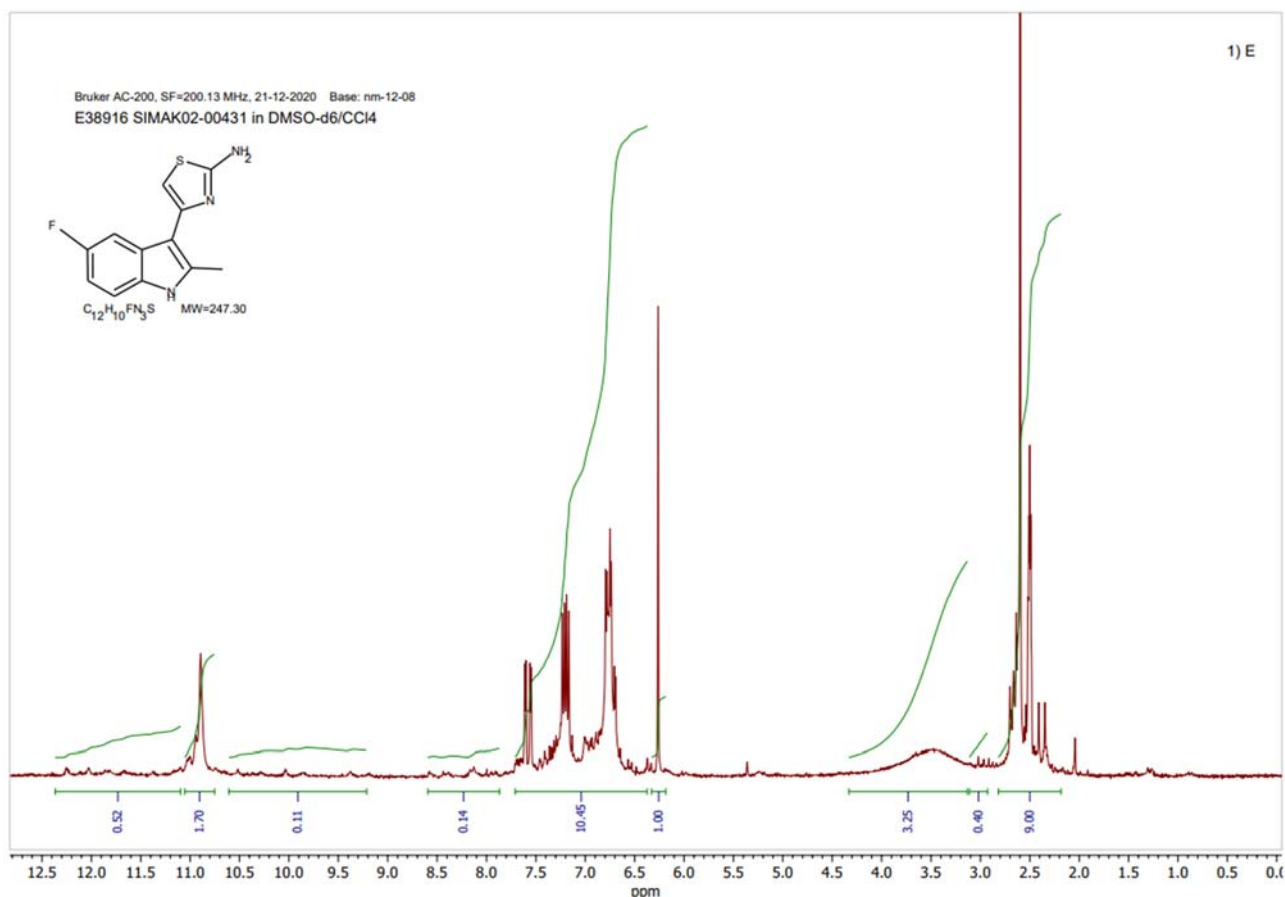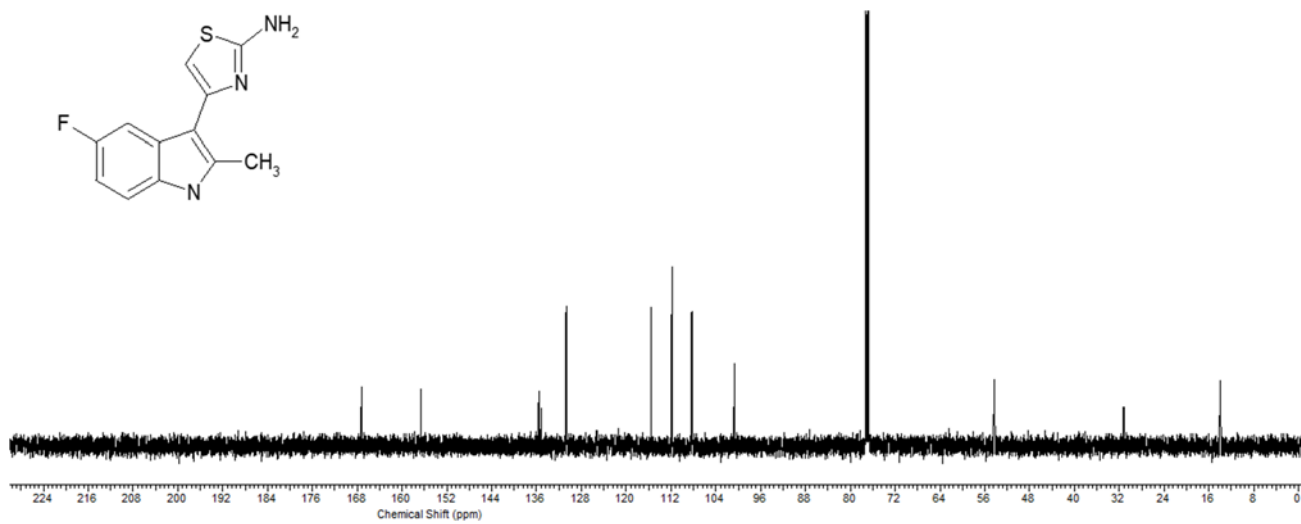

Compound 5r

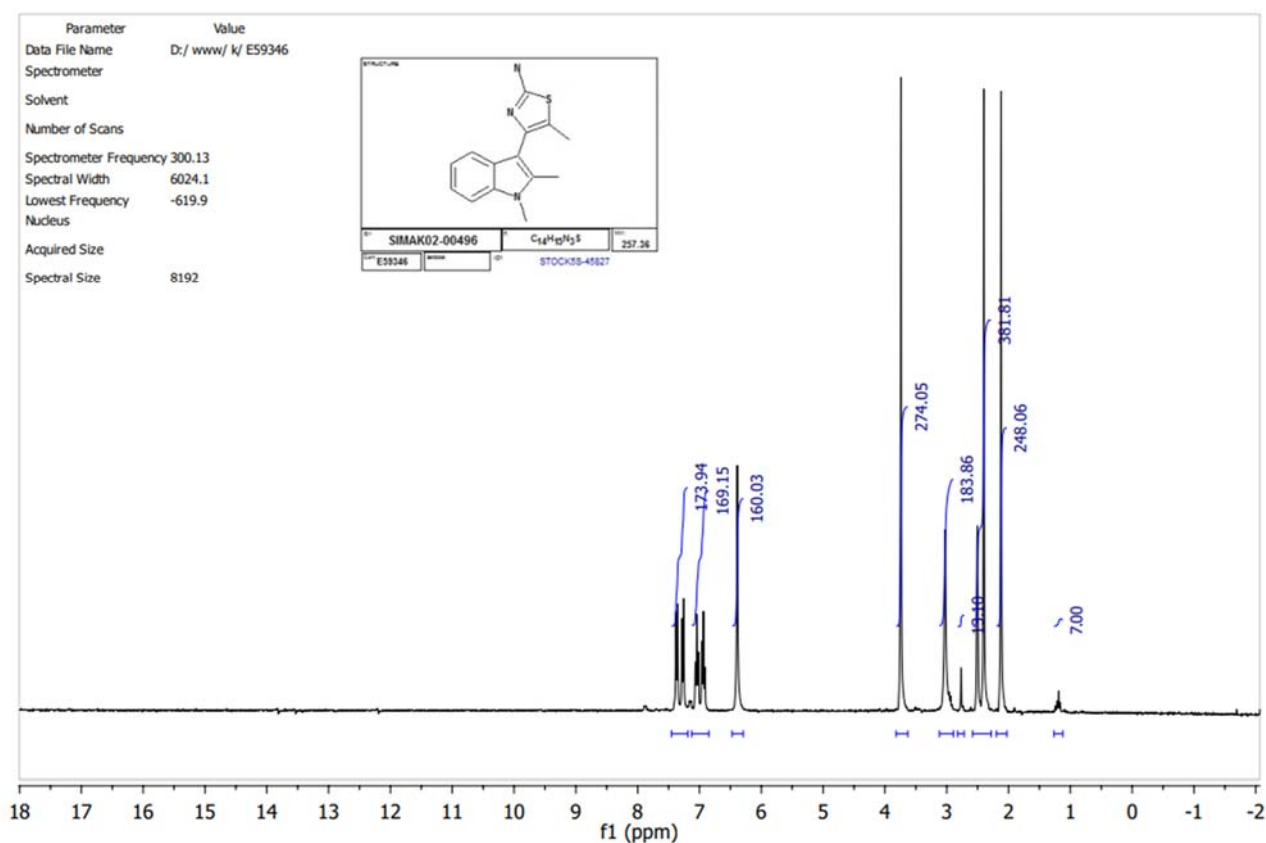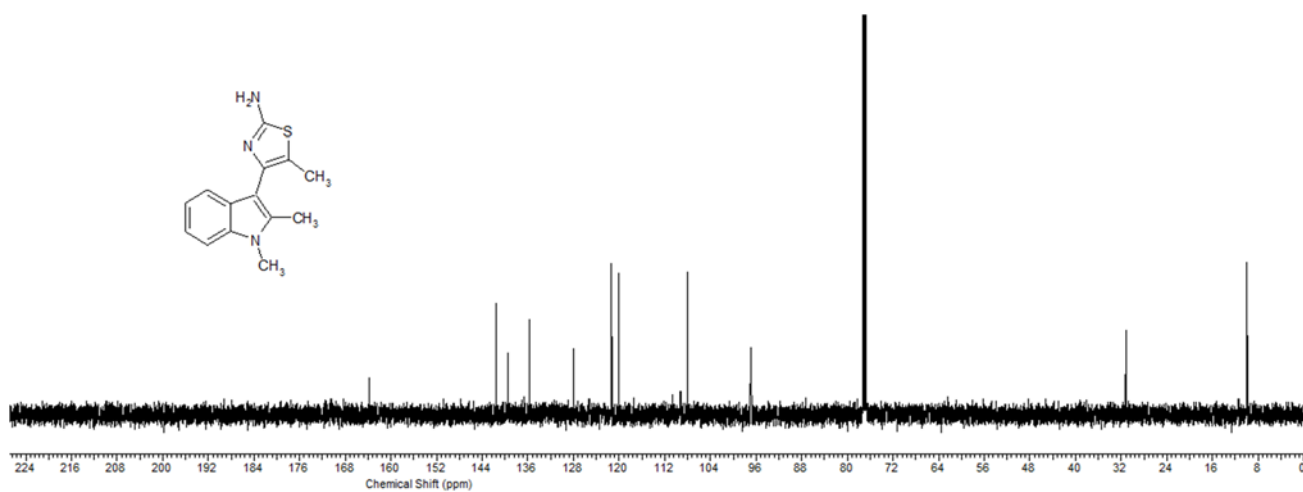

Compound 5s

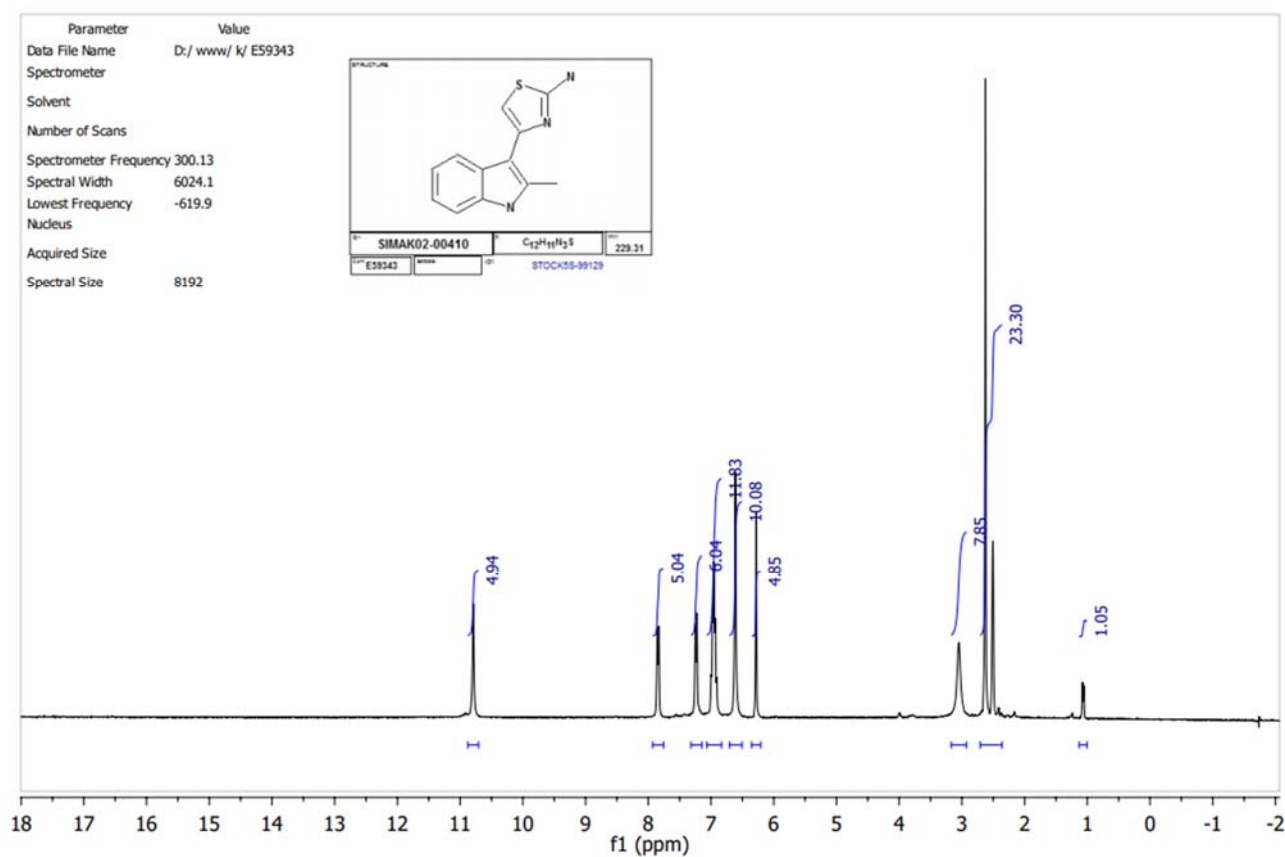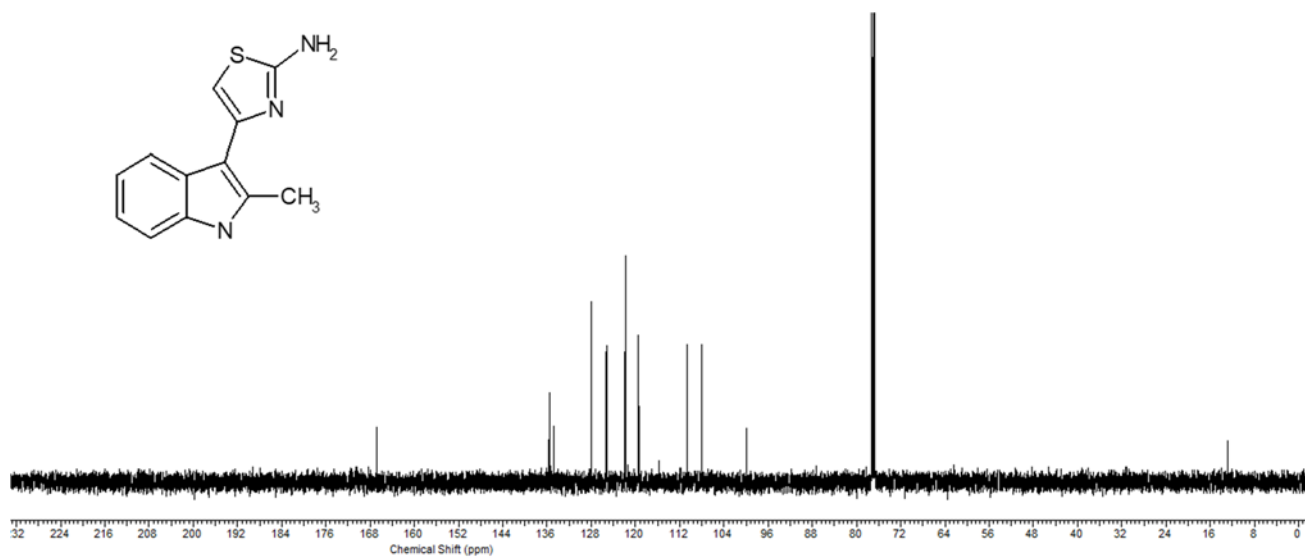

Compound 5t



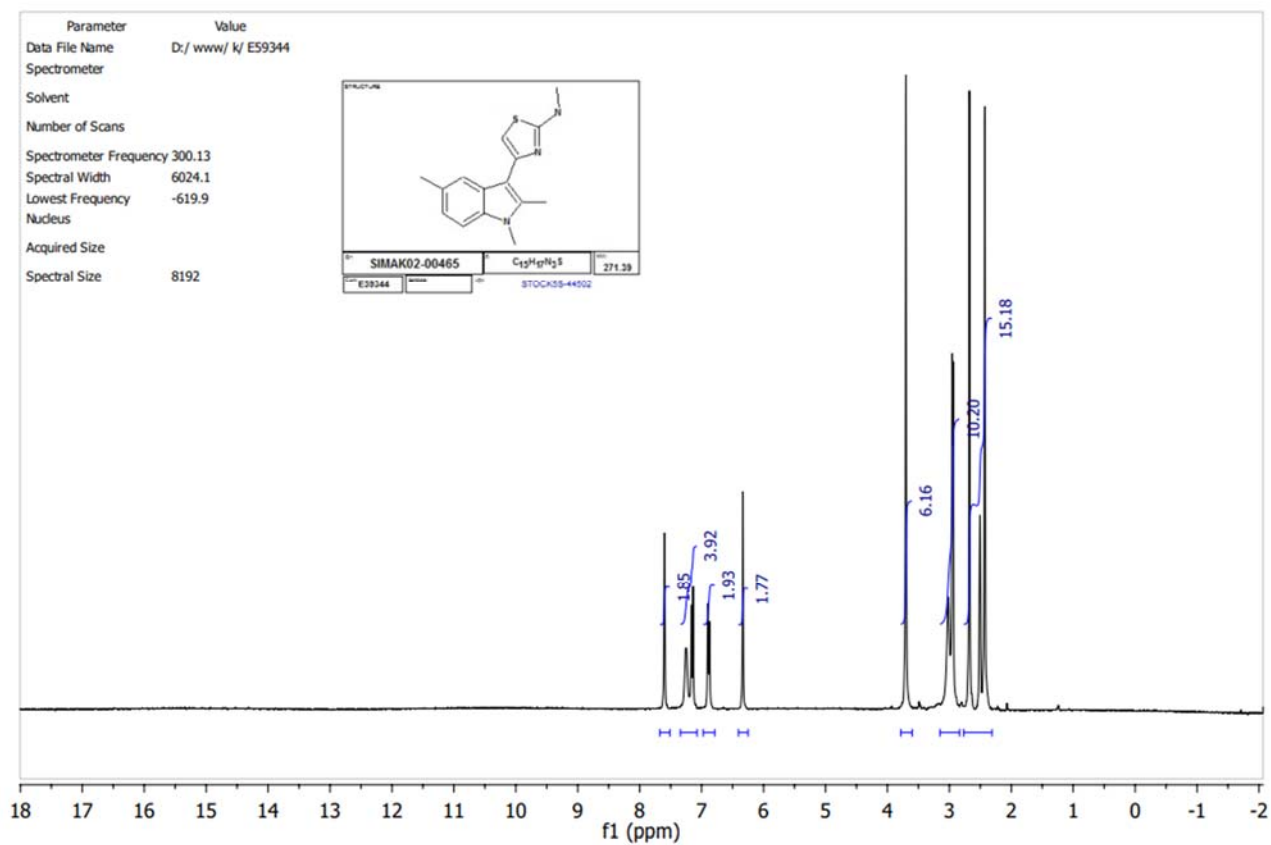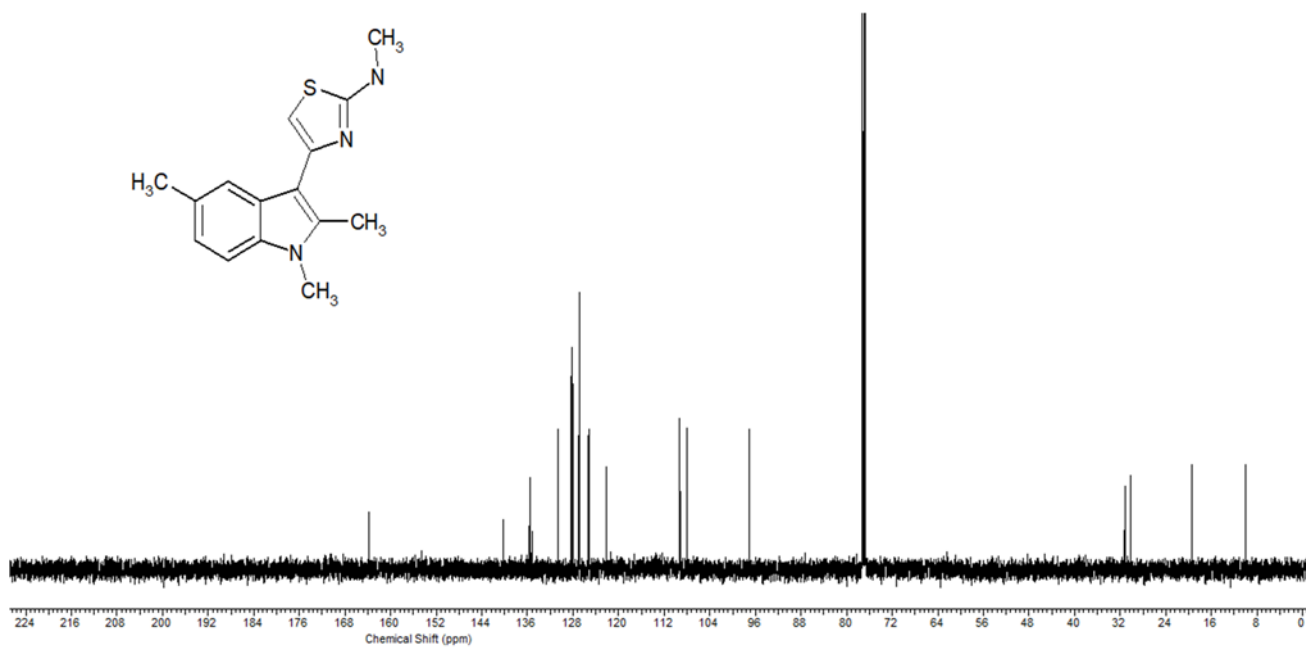

Compound 5u

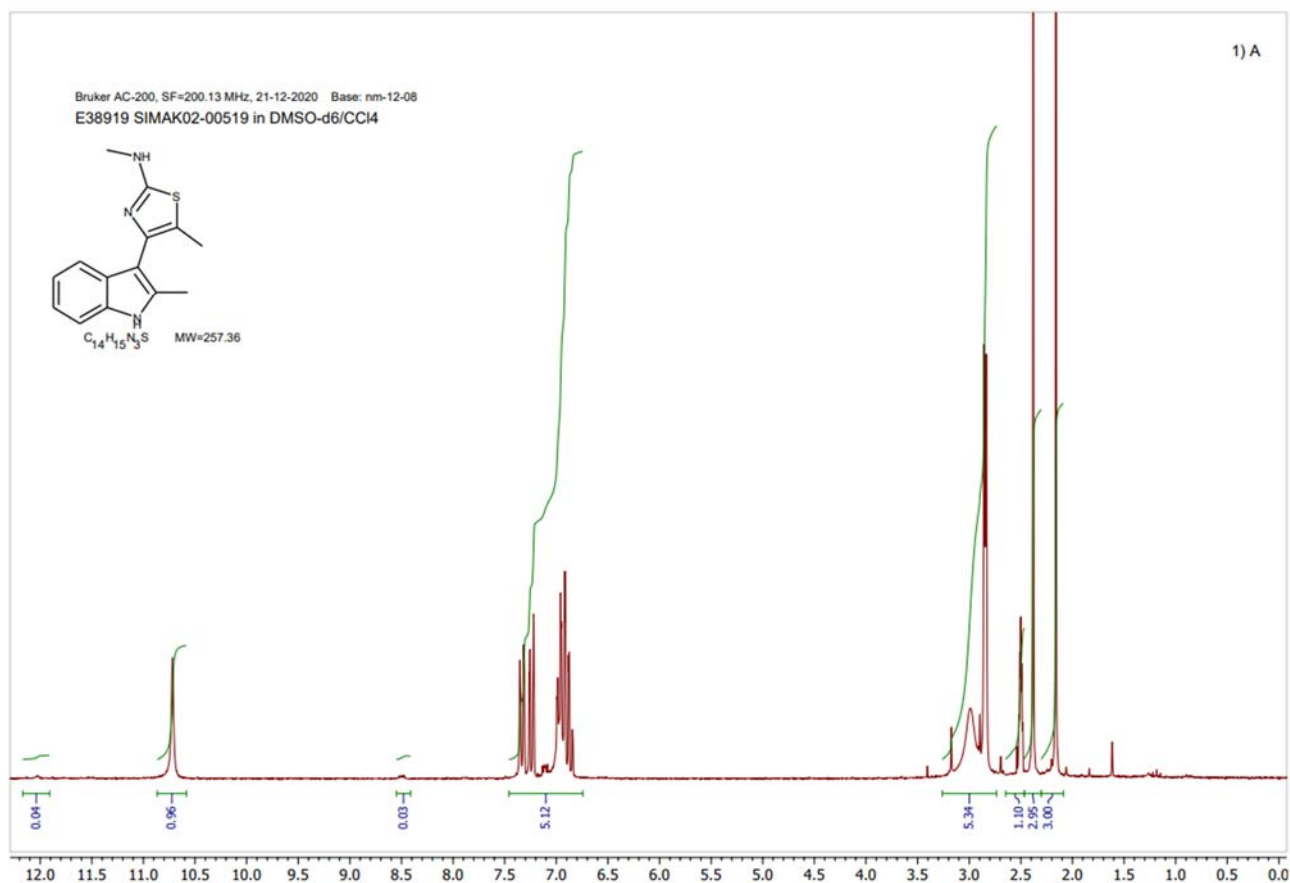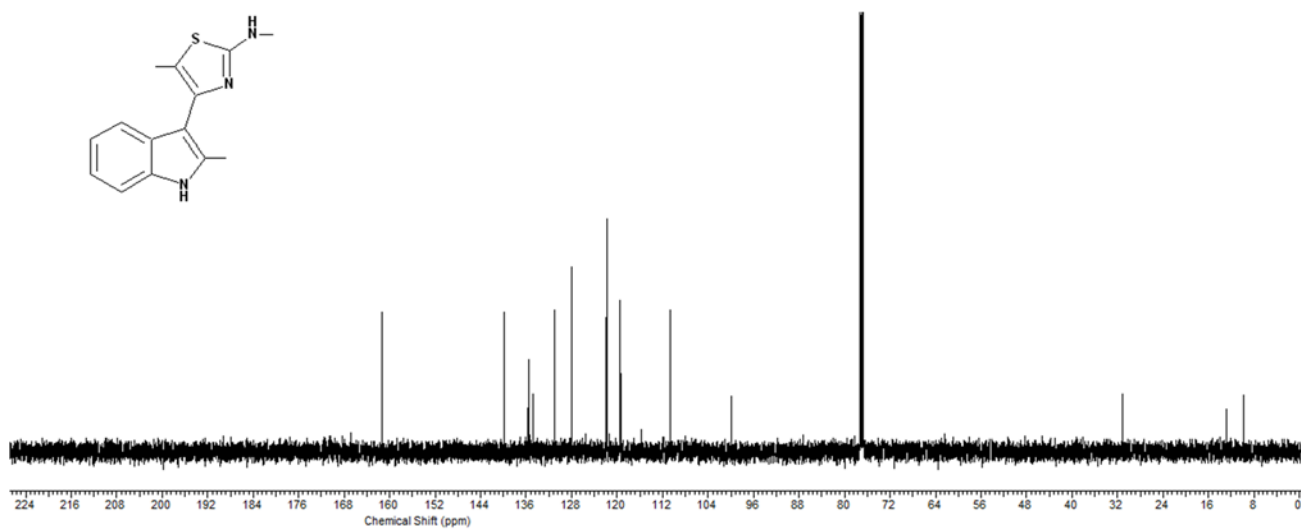

Compound 5V

STOCK3S-35088

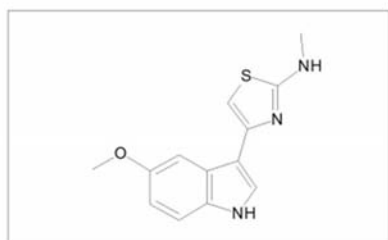

C<sub>13</sub>H<sub>13</sub>N<sub>3</sub>OS

259.332

C49841  
SIMAK-00697

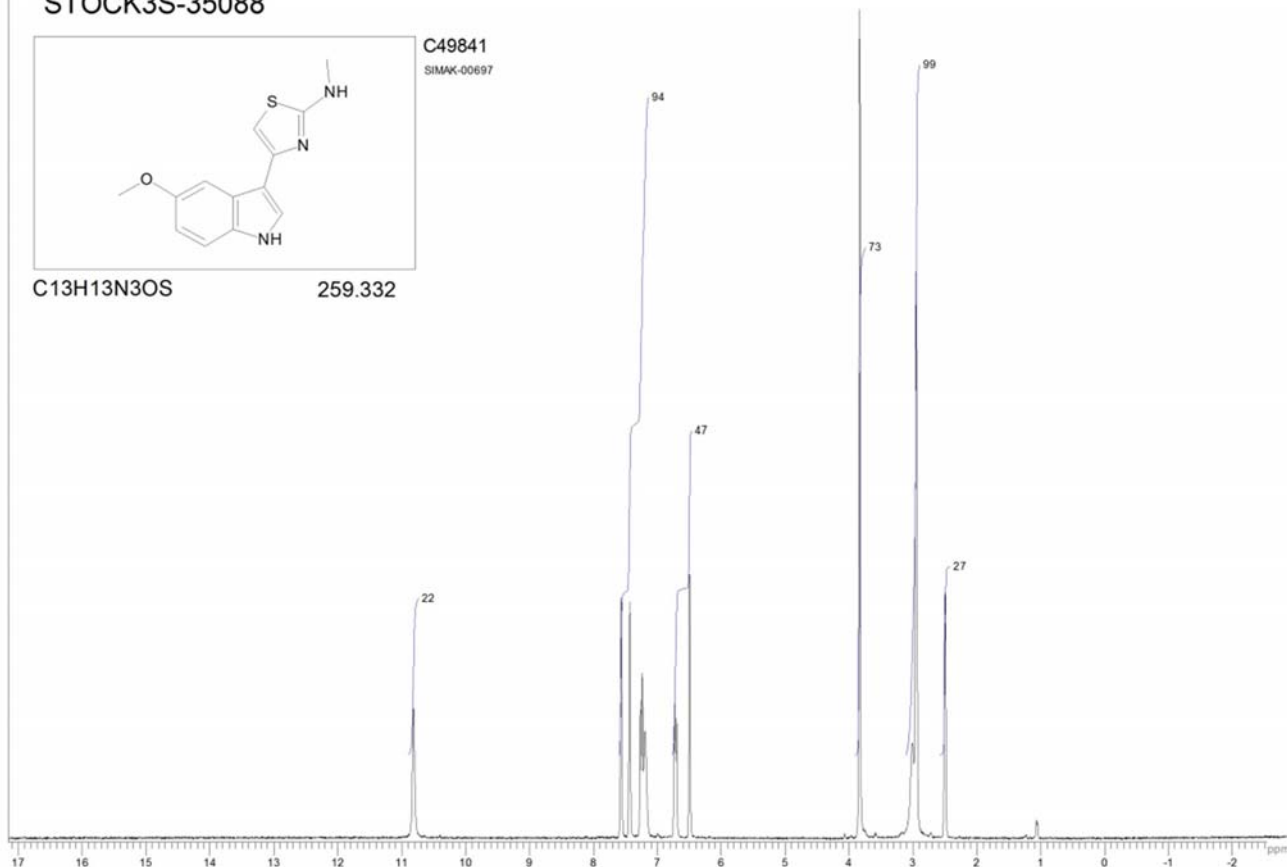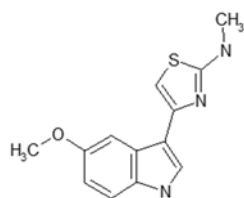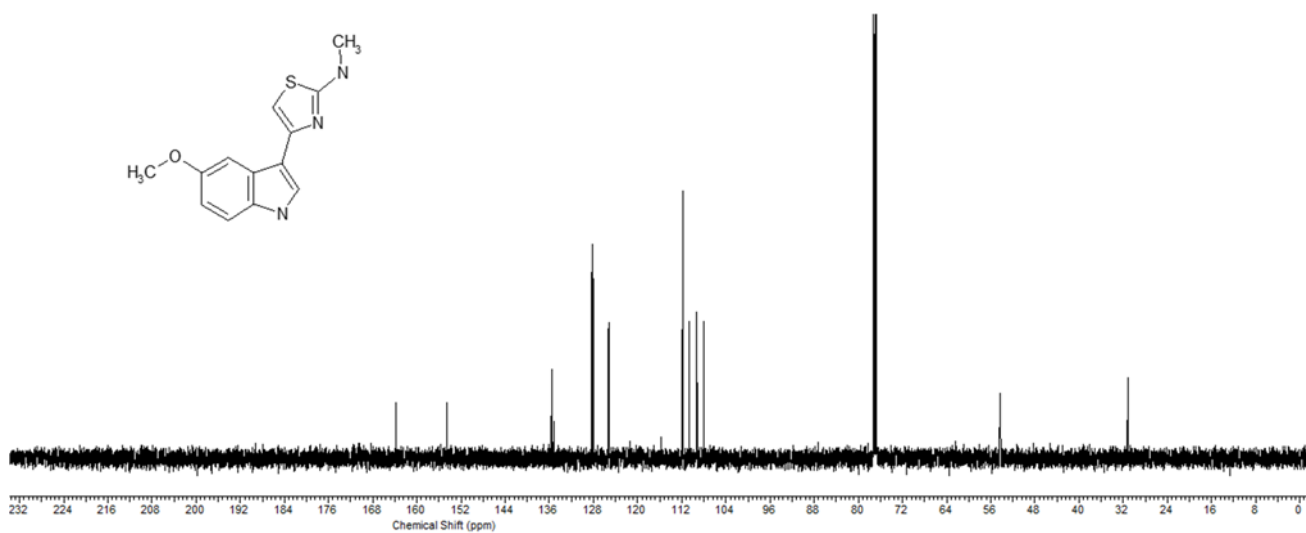

Compound 5W

STOCK4S-31337

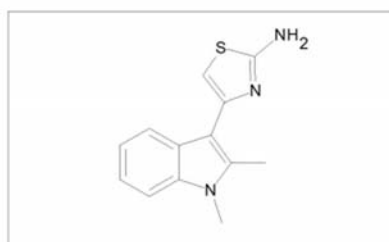

C<sub>13</sub>H<sub>13</sub>N<sub>3</sub>S

243.332

D74380

SIM-BB-061

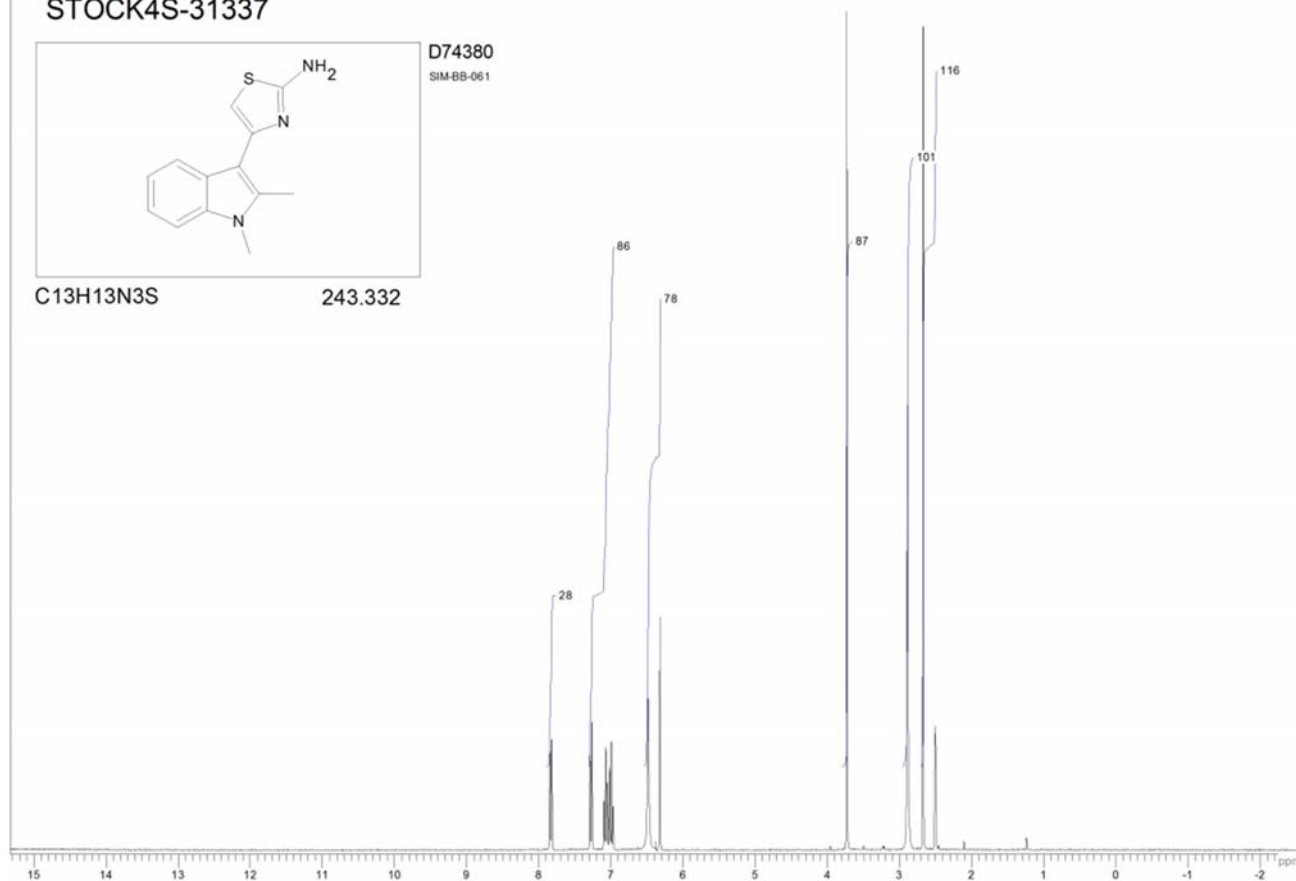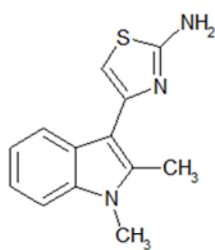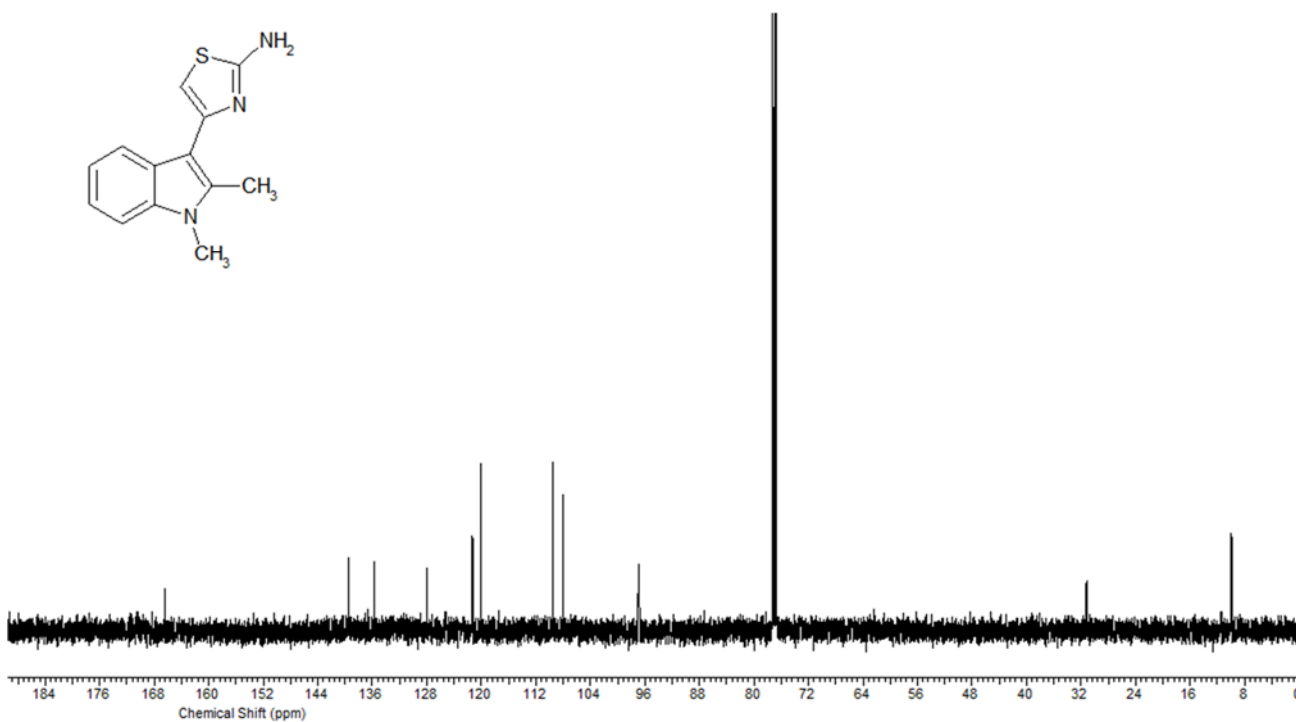

Compound 5X

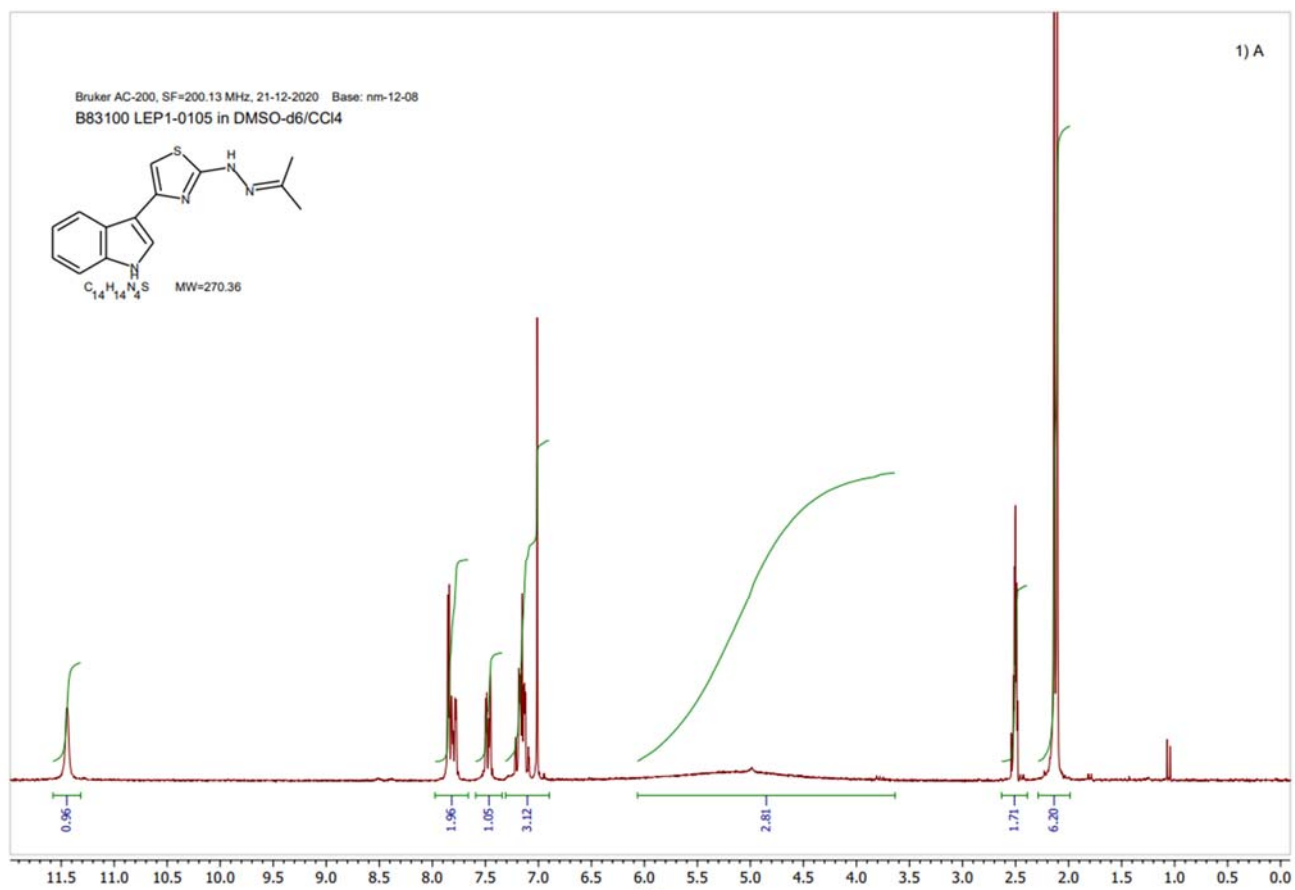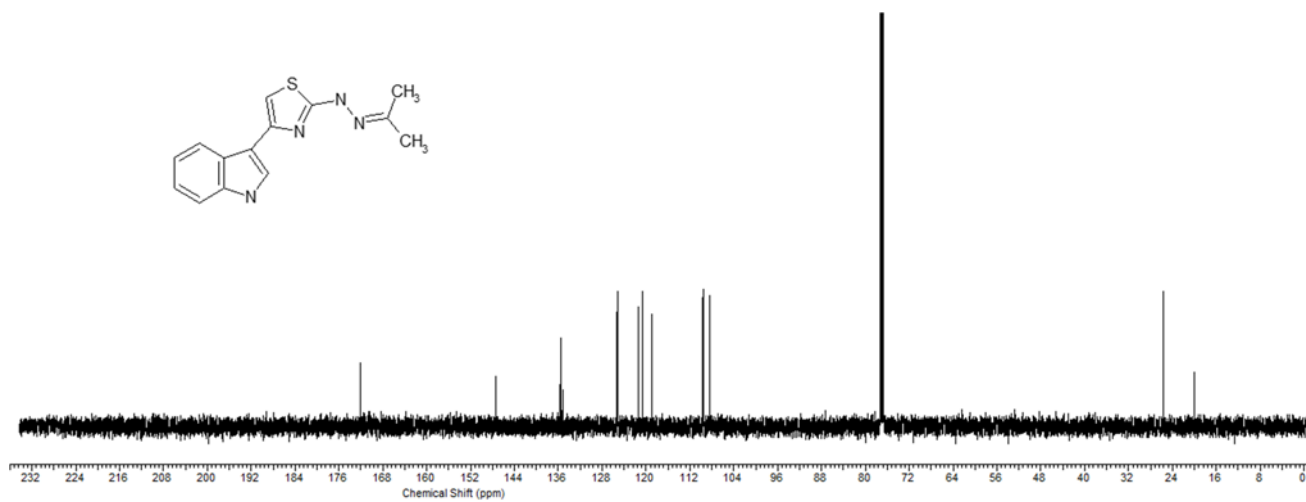

Compound 6a



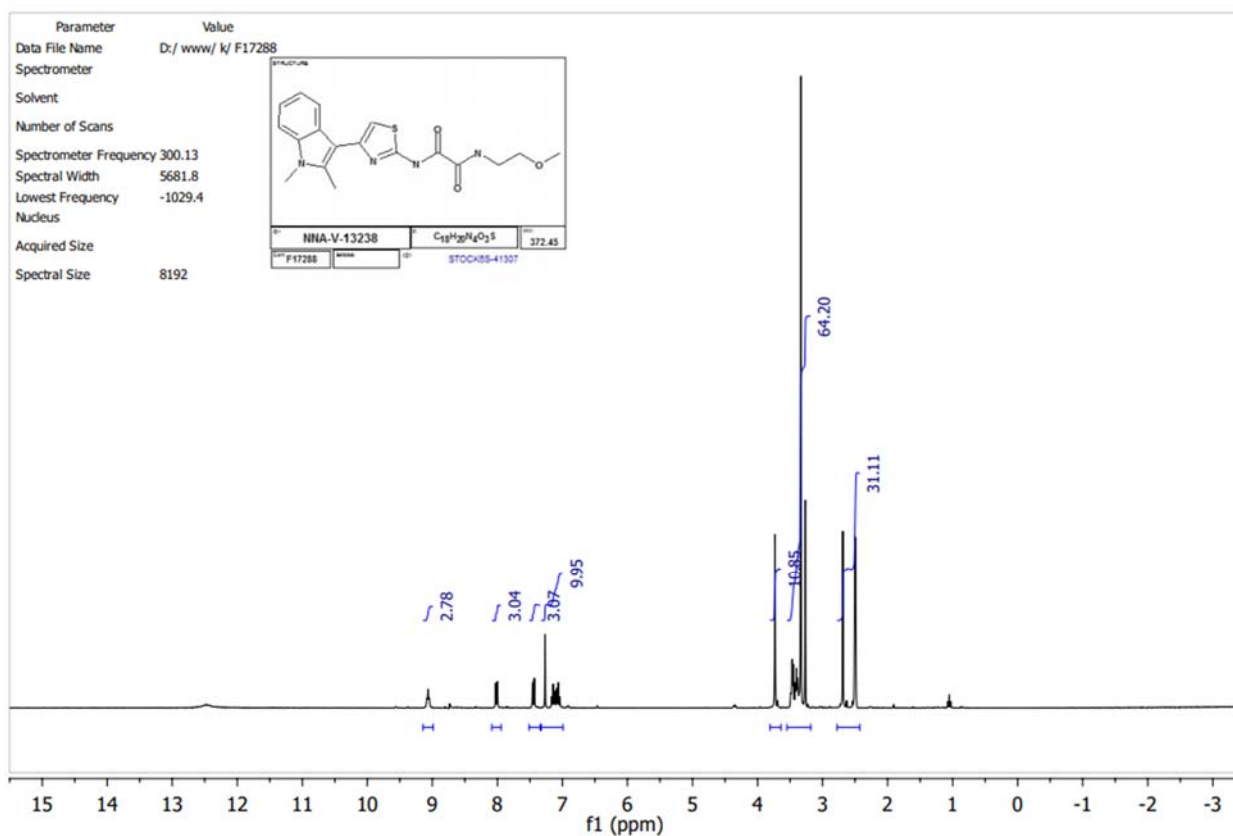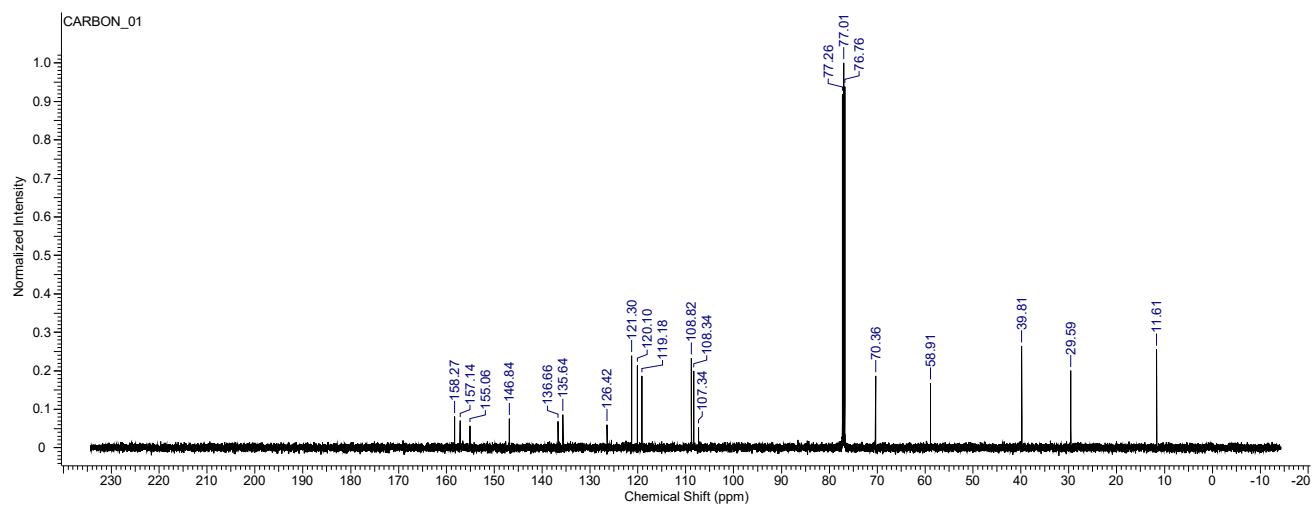

Compound 6c

STOCK7S-16227

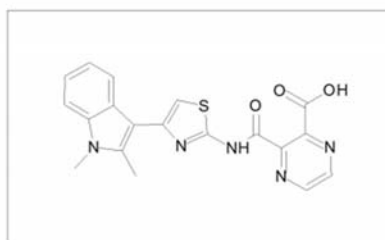

G09090  
NNA-S1684-0232

C19H15N5O3S

393.43

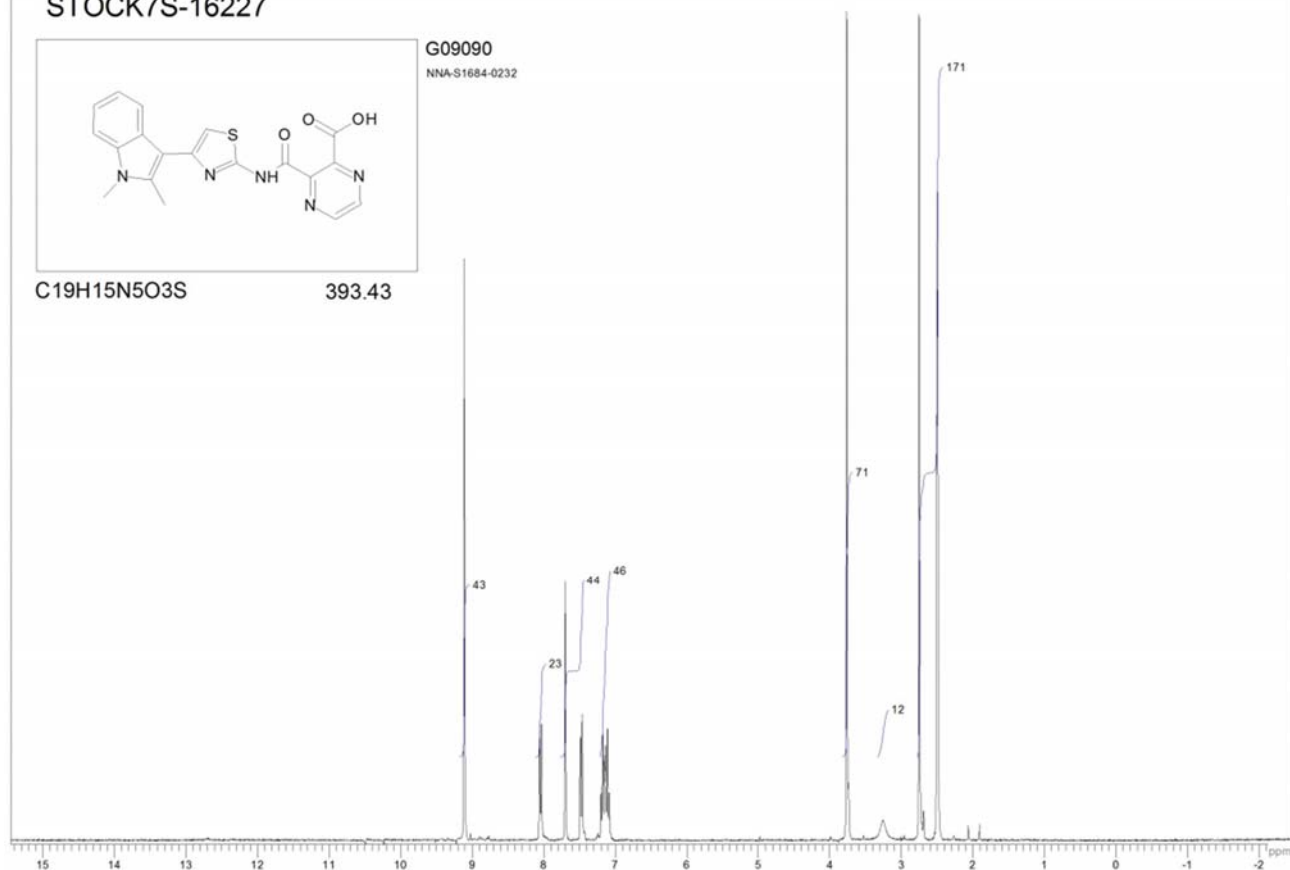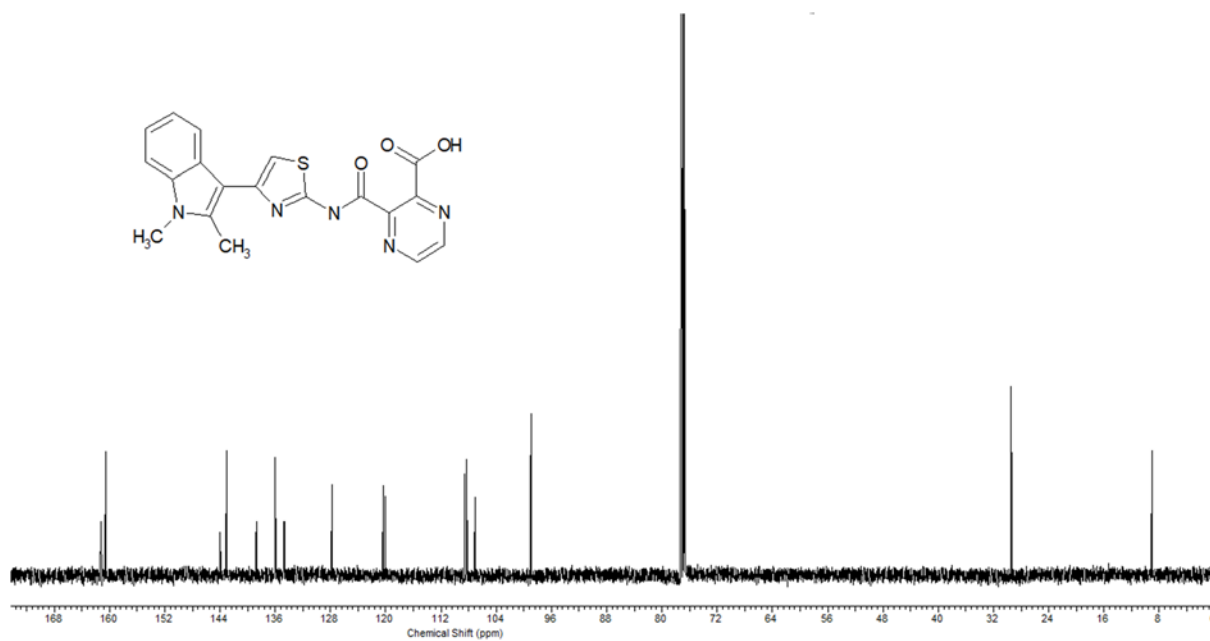

Compound 6d



STOCK7S-17967

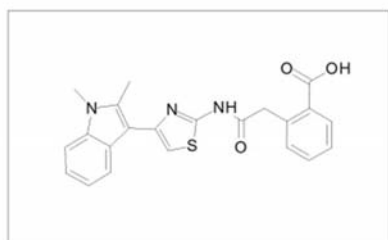

G10303  
NNA10-11-2869

C<sub>22</sub>H<sub>19</sub>N<sub>3</sub>O<sub>3</sub>S

405.48

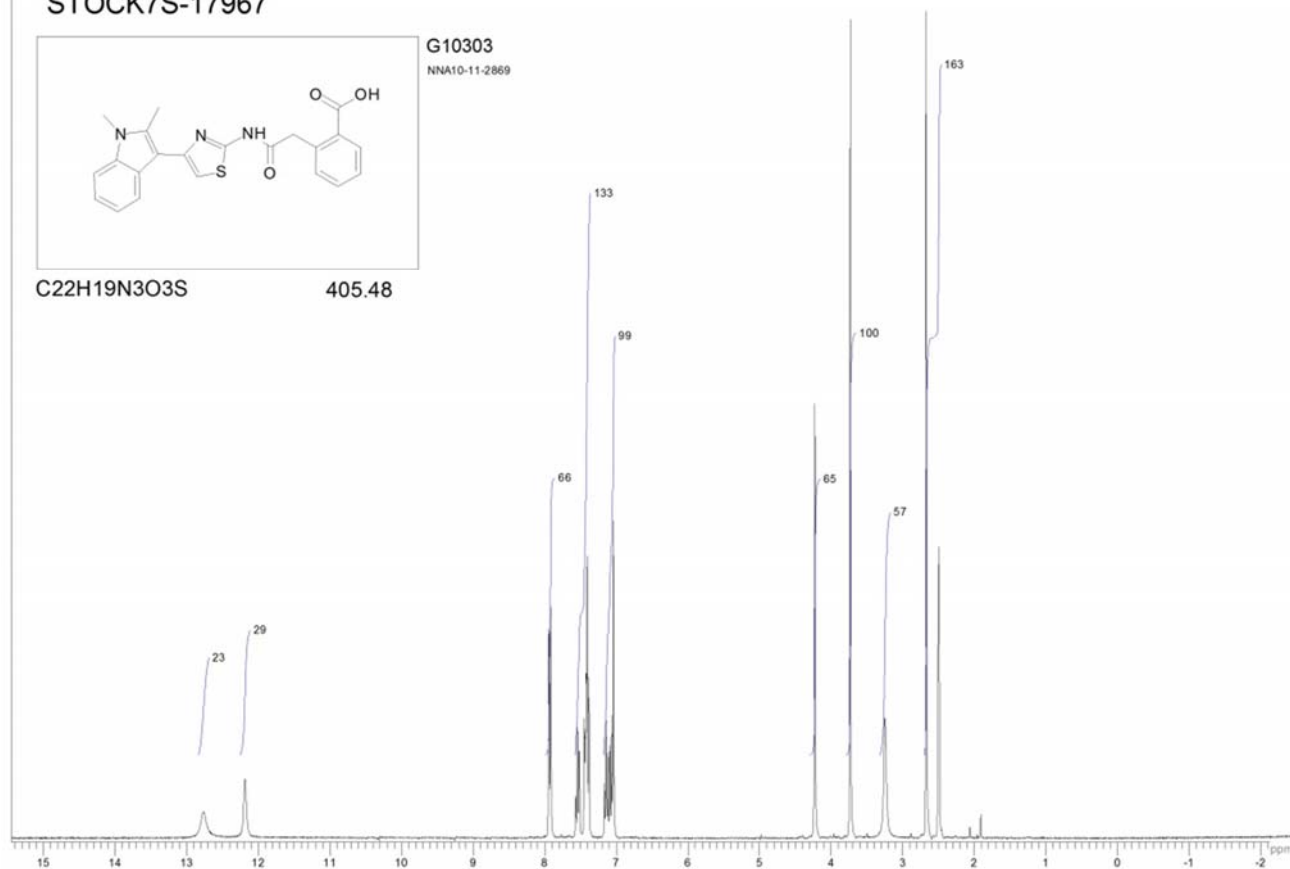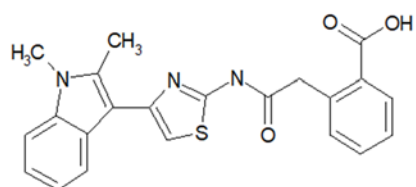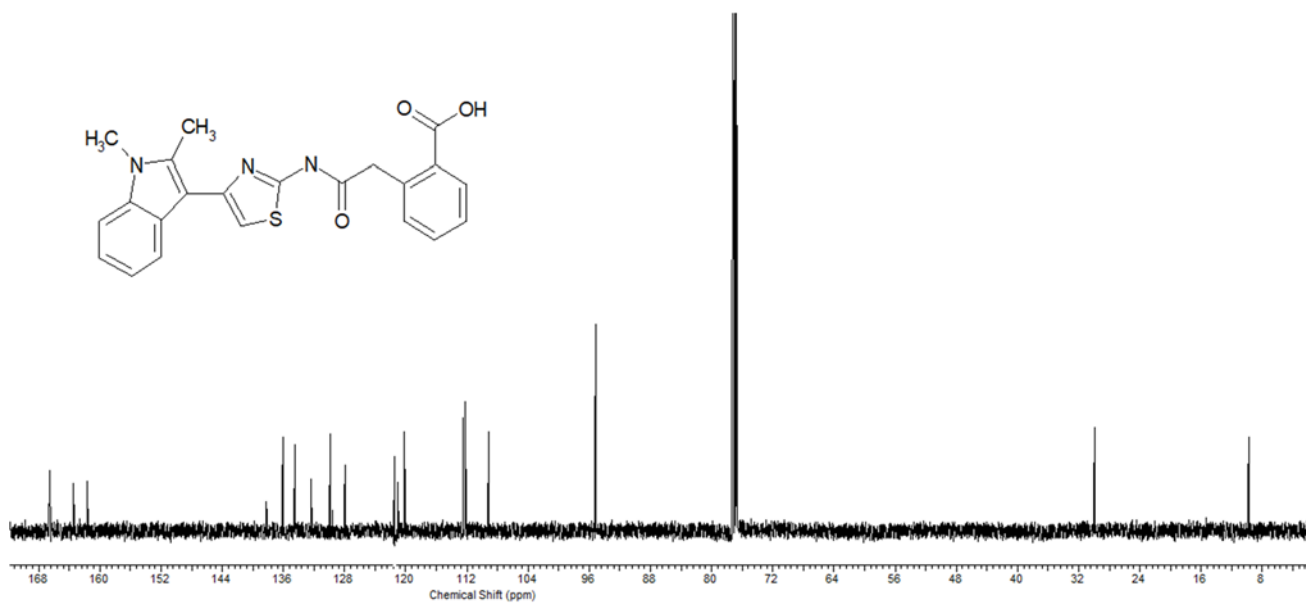

Compound 6e

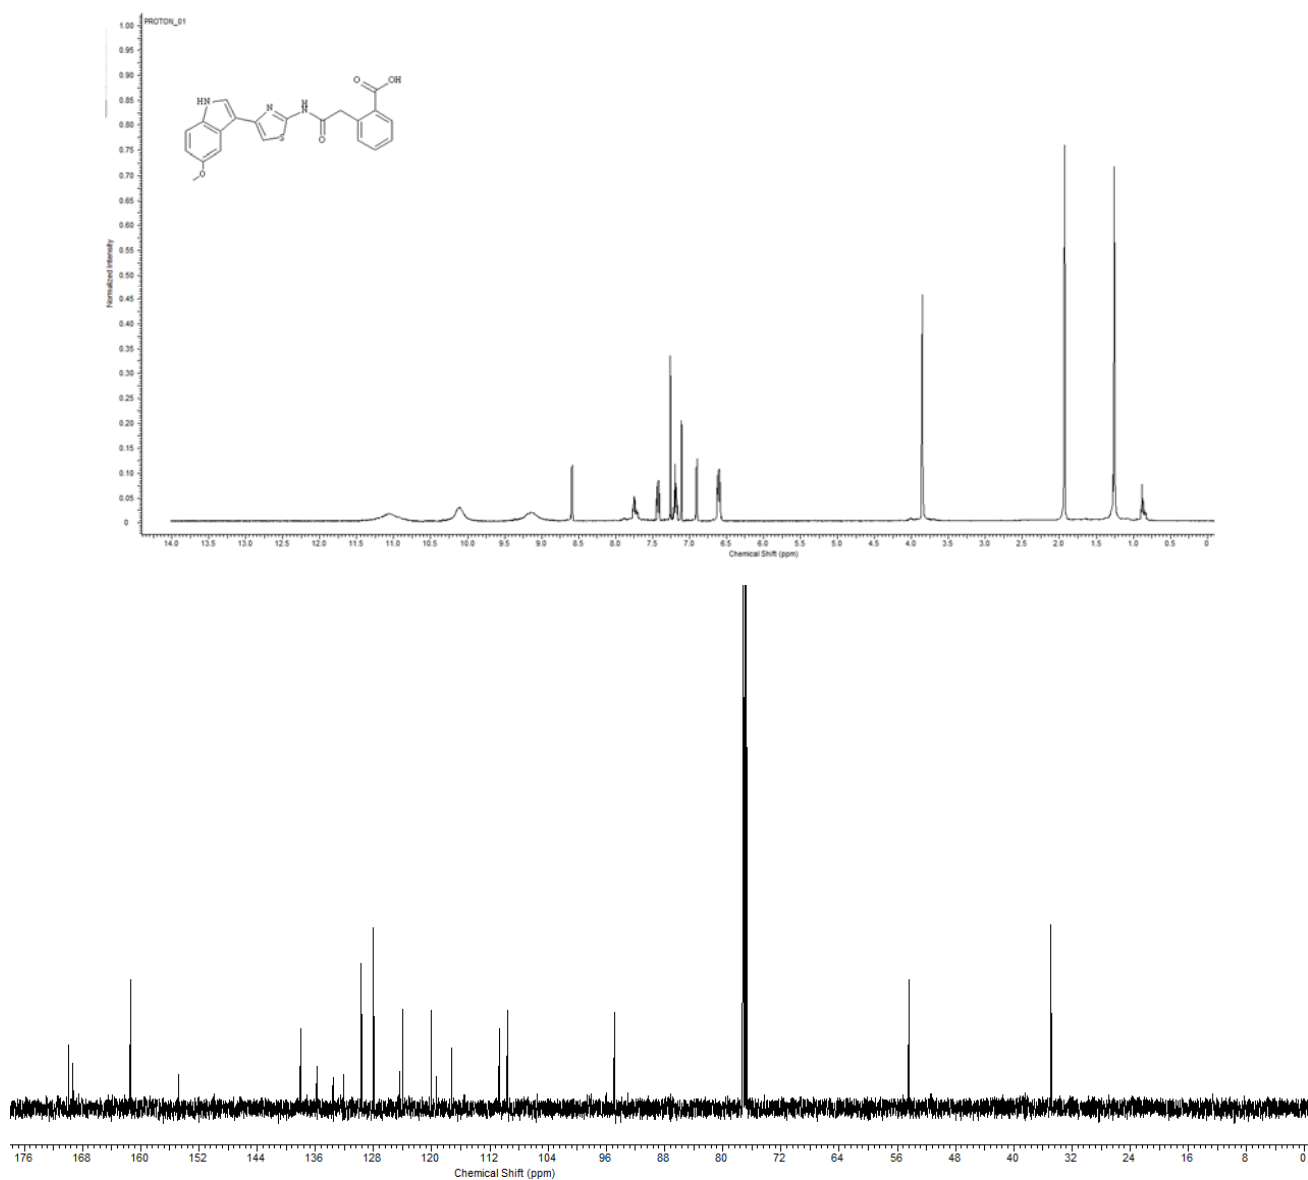

Compound 6f

STOCK7S-24499

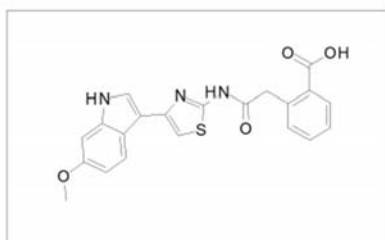

G19010  
NNA10-11-2898

C<sub>21</sub>H<sub>17</sub>N<sub>3</sub>O<sub>4</sub>S

407.45

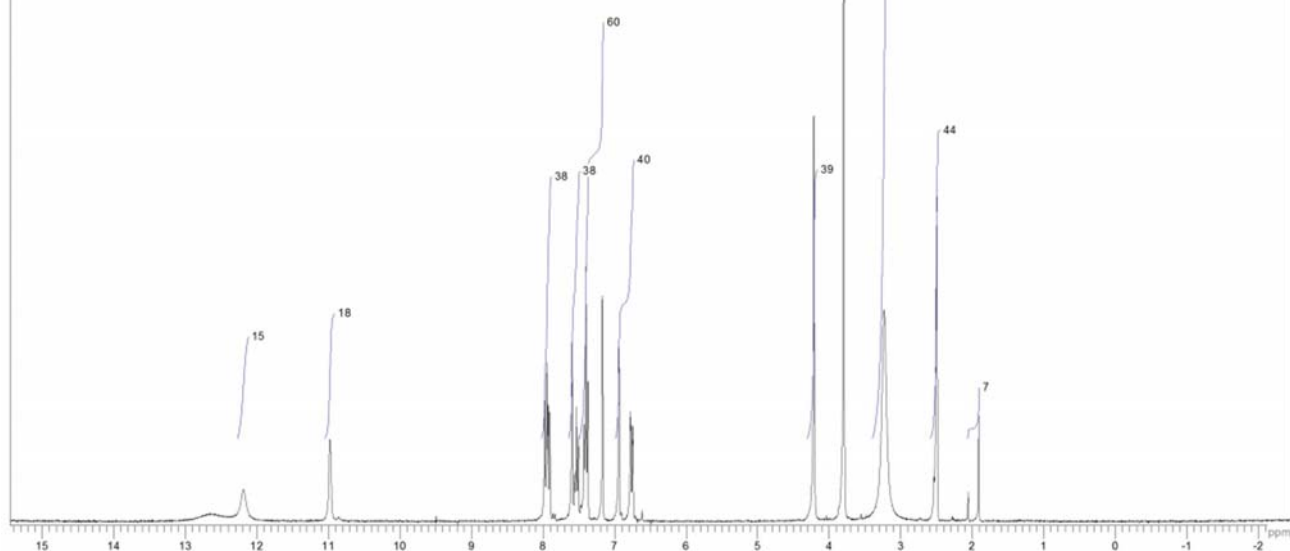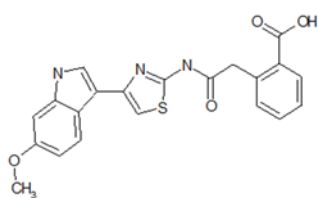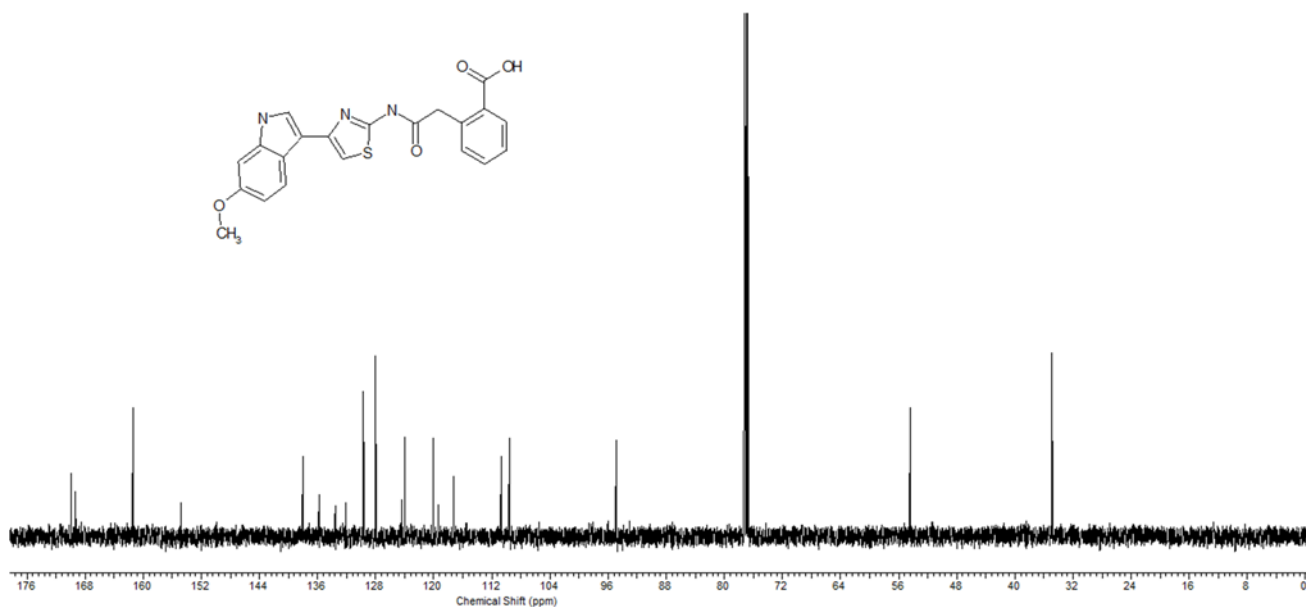

5g OXI H 28480  
5l 23917 oxi H

5m 46779 oxi H  
6E 24276 OXI C
